# Supplementary material for: A Bidirectional Label Propagation Based Computational Model for Potential Microbe-Disease Association Prediction
Source: Front Microbiol. 2019 Apr 9;10:684. doi: 10.3389/fmicb.2019.00684 (PMC6465563; doi:10.3389/fmicb.2019.00684)
Supplement: Supplementary Table 1 — Final prediction result. [file Table_1.XLS]

## Sheet: Sheet1
1	Type 1 diabetes	Clostridium difficile
2	Type 1 diabetes	Helicobacter pylori
3	Type 1 diabetes	Staphylococcus aureus
4	Type 1 diabetes	Clostridium coccoides
5	Type 1 diabetes	Staphylococcus
6	Type 1 diabetes	Escherichia coli
7	Type 1 diabetes	Enterococcus
8	Type 1 diabetes	Stenotrophomonas maltophilia
9	Type 1 diabetes	Burkholderia
10	Type 1 diabetes	Oxalobacter formigenes
11	Type 1 diabetes	Prevotella copri
12	Type 1 diabetes	Tropheryma whipplei
13	Type 1 diabetes	Desulfovibrio
14	Type 1 diabetes	Corynebacterium
15	Type 1 diabetes	Acinetobacter
16	Type 1 diabetes	Clostridium leptum
17	Type 1 diabetes	Dietzia maris
18	Type 1 diabetes	Staphylococcus epidermidis
19	Type 1 diabetes	Fusobacterium nucleatum
20	Type 1 diabetes	Pseudomonas
21	Type 1 diabetes	Propionibacterium
22	Type 1 diabetes	Propionibacterium acnes
23	Type 1 diabetes	Verrucomicrobiaceae
24	Type 1 diabetes	Comamonadaceae
25	Type 1 diabetes	Oxalobacteraceae
26	Type 1 diabetes	Sphingomonadaceae
27	Type 1 diabetes	Alcaligenaceae
28	Type 1 diabetes	Coriobacteriaceae
29	Type 1 diabetes	Methanobrevibacter smithii
30	Type 1 diabetes	Erysipelotrichaceae
31	Type 1 diabetes	Enterobacteriaceae
32	Type 1 diabetes	Collinsella aerofaciens
33	Type 1 diabetes	Treponema
34	Type 1 diabetes	Actinomyces
35	Type 1 diabetes	Porphyromonas gingivalis
36	Type 1 diabetes	Selenomonas
37	Type 1 diabetes	Xanthomonas
38	Type 1 diabetes	Lysobacter
39	Type 1 diabetes	Rickettsiales
40	Type 1 diabetes	Streptococcus mitis
41	Type 1 diabetes	Enterobacter aerogenes
42	Type 1 diabetes	Enterobacter hormaechei
43	Type 1 diabetes	Klebsiella pneumoniae
44	Type 1 diabetes	Shigella dysenteriae
45	Type 1 diabetes	Bacteroidales
46	Type 1 diabetes	Enterococcus faecium
47	Type 1 diabetes	Erysipelotrichales
48	Type 1 diabetes	Faecalibacterium prausnitzii
49	Type 1 diabetes	Betaproteobacteria
50	Type 1 diabetes	Prevotellaceae
51	Type 1 diabetes	Coxiellaceae
52	Type 1 diabetes	Bacilli
53	Type 1 diabetes	Clostridiales
54	Type 1 diabetes	Tannerella
55	Type 1 diabetes	Gammaproteobacteria
56	Type 1 diabetes	Fusobacteriaceae
57	Type 1 diabetes	Veillonellaceae
58	Type 1 diabetes	Clostridium
59	Type 1 diabetes	Streptobacillus
60	Type 1 diabetes	Aerococcus
61	Type 1 diabetes	Atopobium
62	Type 1 diabetes	Atopobium vaginae
63	Type 1 diabetes	Candidate division TM7
64	Type 1 diabetes	Eggerthella
65	Type 1 diabetes	Gardnerella
66	Type 1 diabetes	Gardnerella vaginalis
67	Type 1 diabetes	Lactobacillus crispatus
68	Type 1 diabetes	Lactobacillus iners
69	Type 1 diabetes	Leptotrichia
70	Type 1 diabetes	Leptotrichia amnionii
71	Type 1 diabetes	Mobiluncus
72	Type 1 diabetes	Olsenella
73	Type 1 diabetes	Papillibacter
74	Type 1 diabetes	Porphyromonas uenonis
75	Type 1 diabetes	Nitrospiraceae
76	Type 1 diabetes	Paenibacillaceae
77	Type 1 diabetes	Peptostreptococcaceae
78	Type 1 diabetes	Polyangiaceae
79	Type 1 diabetes	Promicromonosporaceae
80	Type 1 diabetes	Ruminococcus productus
81	Type 1 diabetes	Syntrophobacteraceae
82	Type 1 diabetes	Acidobacteriaceae
83	Type 1 diabetes	Aeromonadaceae
84	Type 1 diabetes	Alteromonadaceae
85	Type 1 diabetes	Anaerovorax
86	Type 1 diabetes	Bacillaceae
87	Type 1 diabetes	Bifidobacterium catenulatum
88	Type 1 diabetes	Cellulomonadaceae
89	Type 1 diabetes	Clostridiaceae
90	Type 1 diabetes	Clostridium cocleatum
91	Type 1 diabetes	Desulfobacteraceae
92	Type 1 diabetes	Desulfovibrionaceae
93	Type 1 diabetes	Thiotrichaceae
94	Type 1 diabetes	Alistipes finegoldii
95	Type 1 diabetes	Alistipes putredinis
96	Type 1 diabetes	Bacteroides eggerthii
97	Type 1 diabetes	Bacteroides finegoldii
98	Type 1 diabetes	Bacteroides sp. D20
99	Type 1 diabetes	Bilophila
100	Type 1 diabetes	Bilophila wadsworthia
101	Type 1 diabetes	Enterococcus faecalis
102	Type 1 diabetes	Eubacterium hallii
103	Type 1 diabetes	Holdemania
104	Type 1 diabetes	Lachnospira
105	Type 1 diabetes	Lactobacillus salivarius
106	Type 1 diabetes	Odoribacter splanchnicus
107	Type 1 diabetes	Parabacteroides distasonis
108	Type 1 diabetes	Parabacteroides merdae
109	Type 1 diabetes	Roseburia hominis
110	Type 1 diabetes	Roseburia intestinalis
111	Type 1 diabetes	Ruminococcus gnavus
112	Type 1 diabetes	Streptococcus anginosus
113	Type 1 diabetes	Streptococcus parasanguinis
114	Type 1 diabetes	Streptococcus salivarius
115	Type 1 diabetes	Streptococcus vestibularis
116	Type 1 diabetes	Veillonella atypica
117	Type 1 diabetes	Veillonella dispar
118	Type 1 diabetes	Veillonella parvula
119	Type 1 diabetes	Megasphaera
120	Type 1 diabetes	Coprococcus
121	Type 1 diabetes	Dorea
122	Type 1 diabetes	Haemophilus parainfluenzae
123	Type 1 diabetes	Pasteurellaceae
124	Type 1 diabetes	Ruminococcus
125	Type 1 diabetes	Streptococcaceae
126	Liver cirrhosis	Clostridium difficile
127	Liver cirrhosis	Helicobacter pylori
128	Liver cirrhosis	Firmicutes
129	Liver cirrhosis	Clostridium coccoides
130	Liver cirrhosis	Staphylococcus aureus
131	Liver cirrhosis	Actinobacteria
132	Liver cirrhosis	Clostridia
133	Liver cirrhosis	Staphylococcus
134	Liver cirrhosis	Bifidobacterium
135	Liver cirrhosis	Escherichia coli
136	Liver cirrhosis	Stenotrophomonas maltophilia
137	Liver cirrhosis	Enterococcus
138	Liver cirrhosis	Burkholderia
139	Liver cirrhosis	Collinsella aerofaciens
140	Liver cirrhosis	Oxalobacter formigenes
141	Liver cirrhosis	Prevotella copri
142	Liver cirrhosis	Tropheryma whipplei
143	Liver cirrhosis	Clostridium leptum
144	Liver cirrhosis	Desulfovibrio
145	Liver cirrhosis	Acinetobacter
146	Liver cirrhosis	Corynebacterium
147	Liver cirrhosis	Klebsiella
148	Liver cirrhosis	Dietzia maris
149	Liver cirrhosis	Staphylococcus epidermidis
150	Liver cirrhosis	Bacteroides vulgatus
151	Liver cirrhosis	Pseudomonas
152	Liver cirrhosis	Fusobacterium nucleatum
153	Liver cirrhosis	Bacteroides ovatus
154	Liver cirrhosis	Propionibacterium
155	Liver cirrhosis	Propionibacterium acnes
156	Liver cirrhosis	Prevotellaceae
157	Liver cirrhosis	Comamonadaceae
158	Liver cirrhosis	Oxalobacteraceae
159	Liver cirrhosis	Sphingomonadaceae
160	Liver cirrhosis	Alcaligenaceae
161	Liver cirrhosis	Coriobacteriaceae
162	Liver cirrhosis	Erysipelotrichaceae
163	Liver cirrhosis	Methanobrevibacter smithii
164	Liver cirrhosis	Betaproteobacteria
165	Liver cirrhosis	Coxiellaceae
166	Liver cirrhosis	Treponema
167	Liver cirrhosis	Actinomyces
168	Liver cirrhosis	Porphyromonas gingivalis
169	Liver cirrhosis	Selenomonas
170	Liver cirrhosis	Verrucomicrobiaceae
171	Liver cirrhosis	Lysobacter
172	Liver cirrhosis	Rickettsiales
173	Liver cirrhosis	Streptococcus mitis
174	Liver cirrhosis	Xanthomonas
175	Liver cirrhosis	Bacteroidales
176	Liver cirrhosis	Enterococcus faecium
177	Liver cirrhosis	Erysipelotrichales
178	Liver cirrhosis	Gammaproteobacteria
179	Liver cirrhosis	Clostridiales
180	Liver cirrhosis	Enterobacter aerogenes
181	Liver cirrhosis	Enterobacter hormaechei
182	Liver cirrhosis	Klebsiella pneumoniae
183	Liver cirrhosis	Shigella dysenteriae
184	Liver cirrhosis	Porphyromonadaceae
185	Liver cirrhosis	Bacteroides fragilis
186	Liver cirrhosis	Porphyromonas
187	Liver cirrhosis	Rikenellaceae
188	Liver cirrhosis	Ruminococcaceae
189	Liver cirrhosis	Acidobacteriaceae
190	Liver cirrhosis	Aeromonadaceae
191	Liver cirrhosis	Alteromonadaceae
192	Liver cirrhosis	Anaerovorax
193	Liver cirrhosis	Bacillaceae
194	Liver cirrhosis	Bifidobacterium catenulatum
195	Liver cirrhosis	Cellulomonadaceae
196	Liver cirrhosis	Clostridiaceae
197	Liver cirrhosis	Clostridium cocleatum
198	Liver cirrhosis	Desulfobacteraceae
199	Liver cirrhosis	Desulfovibrionaceae
200	Liver cirrhosis	Nitrospiraceae
201	Liver cirrhosis	Paenibacillaceae
202	Liver cirrhosis	Peptostreptococcaceae
203	Liver cirrhosis	Polyangiaceae
204	Liver cirrhosis	Promicromonosporaceae
205	Liver cirrhosis	Ruminococcus productus
206	Liver cirrhosis	Syntrophobacteraceae
207	Liver cirrhosis	Thiotrichaceae
208	Liver cirrhosis	Citrobacter
209	Liver cirrhosis	Streptobacillus
210	Liver cirrhosis	Atopobium
211	Liver cirrhosis	Atopobium vaginae
212	Liver cirrhosis	Candidate division TM7
213	Liver cirrhosis	Eggerthella
214	Liver cirrhosis	Gardnerella
215	Liver cirrhosis	Gardnerella vaginalis
216	Liver cirrhosis	Lactobacillus crispatus
217	Liver cirrhosis	Lactobacillus iners
218	Liver cirrhosis	Leptotrichia
219	Liver cirrhosis	Leptotrichia amnionii
220	Liver cirrhosis	Mobiluncus
221	Liver cirrhosis	Olsenella
222	Liver cirrhosis	Papillibacter
223	Liver cirrhosis	Porphyromonas uenonis
224	Liver cirrhosis	Aerococcus
225	Liver cirrhosis	Eubacteriaceae
226	Liver cirrhosis	Shuttleworthia
227	Liver cirrhosis	Acetonema
228	Liver cirrhosis	Actinobacillus
229	Liver cirrhosis	Aggregatibacter
230	Liver cirrhosis	Akkermansia
231	Liver cirrhosis	Anaerofilum
232	Liver cirrhosis	Anaerostipes
233	Liver cirrhosis	Anaerotruncus
234	Liver cirrhosis	Bacillus
235	Liver cirrhosis	Bacterium 08.96.4
236	Liver cirrhosis	Bacterium ASF500
237	Liver cirrhosis	Bacterium B4C2-5
238	Liver cirrhosis	Bacterium Ba2
239	Liver cirrhosis	Bacterium C15
240	Liver cirrhosis	Bacterium G100VIII
241	Liver cirrhosis	Bacterium ic1214
242	Liver cirrhosis	Bacterium ic1258
243	Liver cirrhosis	Bacterium ic1292
244	Liver cirrhosis	Bacterium ic1296
245	Liver cirrhosis	Bacterium ic1311
246	Liver cirrhosis	Bacterium ic1379
247	Liver cirrhosis	Bacterium ic1391
248	Liver cirrhosis	Bacterium MB7-1
249	Liver cirrhosis	Bacterium mpn-isolate group 19
250	Liver cirrhosis	Bacterium mpn-isolate group 22
251	Liver cirrhosis	Bacterium mpn-isolate group 24
252	Liver cirrhosis	Bacterium mpn-isolate group 27
253	Liver cirrhosis	Bacterium mpn-isolate group 5
254	Liver cirrhosis	Bacterium 'New Zealand B'
255	Liver cirrhosis	Bacterium str. 31285
256	Liver cirrhosis	Bacterium YE62
257	Liver cirrhosis	Bacterium YE64
258	Liver cirrhosis	Bacteroidaceae bacterium Smarlab 3301643
259	Liver cirrhosis	Bacteroides sp. CJ78
260	Liver cirrhosis	Bacteroides thetaiotaomicron
261	Liver cirrhosis	Bovine rumen bacterium JPR13
262	Liver cirrhosis	Brenneria
263	Liver cirrhosis	Burkholderiales bacterium Smarlab 3302047
264	Liver cirrhosis	Butyrate-producing bacterium ART55/1
265	Liver cirrhosis	Butyrate-producing bacterium L1-810
266	Liver cirrhosis	Butyrate-producing bacterium L2-50
267	Liver cirrhosis	Butyrate-producing bacterium M104/1
268	Liver cirrhosis	Butyrate-producing bacterium M21/2
269	Liver cirrhosis	Butyrate-producing bacterium M50/1
270	Liver cirrhosis	Butyrate-producing bacterium P607
271	Liver cirrhosis	Butyrate-producing bacterium PH05YB02
272	Liver cirrhosis	Butyrate-producing bacterium Ph07AY02
273	Liver cirrhosis	Butyrate-producing bacterium PH07AY3
274	Liver cirrhosis	Butyrate-producing bacterium PH07AY5
275	Liver cirrhosis	Butyrate-producing bacterium PH07BY04
276	Liver cirrhosis	Butyrate-producing bacterium SL6/1/1
277	Liver cirrhosis	Butyrate-producing bacterium SM4/1
278	Liver cirrhosis	Butyrate-producing bacterium SR1/1
279	Liver cirrhosis	Butyrate-producing bacterium SR1/5
280	Liver cirrhosis	Butyrate-producing bacterium SS2/1
281	Liver cirrhosis	Butyrate-producing bacterium SSC/2
282	Liver cirrhosis	Butyrate-producing bacterium T2-132
283	Liver cirrhosis	Clostridia bacterium TSW07CA7
284	Liver cirrhosis	Clostridiaceae bacterium bSSV31
285	Liver cirrhosis	Clostridiaceae bacterium LEMV63
286	Liver cirrhosis	Clostridiaceae bacterium SH032
287	Liver cirrhosis	Clostridiaceae bacterium SK061
288	Liver cirrhosis	Clostridiales bacterium 80/3
289	Liver cirrhosis	Clostridiales bacterium A2-162
290	Liver cirrhosis	Clostridiales bacterium AHT16
291	Liver cirrhosis	Clostridiales bacterium L2-14
292	Liver cirrhosis	Clostridium innocuum
293	Liver cirrhosis	Clostridium ramosum
294	Liver cirrhosis	Clostridium spiroforme
295	Liver cirrhosis	Collinsella
296	Liver cirrhosis	Coprobacillus
297	Liver cirrhosis	Cronobacter
298	Liver cirrhosis	Dehalobacterium
299	Liver cirrhosis	Desulfotomaculum
300	Liver cirrhosis	Dialister
301	Liver cirrhosis	Dysgonomonas
302	Liver cirrhosis	Edwardsiella
303	Liver cirrhosis	Enterobacter
304	Liver cirrhosis	Erwinia
305	Liver cirrhosis	Erysipelothrix
306	Liver cirrhosis	Escherichia
307	Liver cirrhosis	Eubacterium tortuosum
308	Liver cirrhosis	Firmicutes bacterium EG14
309	Liver cirrhosis	Firmicutes str. C29
310	Liver cirrhosis	Gram-negative bacterium cL10-2b-4
311	Liver cirrhosis	Hafnia
312	Liver cirrhosis	Human intestinal firmicute CB47
313	Liver cirrhosis	Human intestinal firmicute CO13
314	Liver cirrhosis	Human intestinal firmicute CO19
315	Liver cirrhosis	Human intestinal firmicute CO2
316	Liver cirrhosis	Human intestinal firmicute CO35
317	Liver cirrhosis	Human intestinal firmicute CO4
318	Liver cirrhosis	Human intestinal firmicute CS26
319	Liver cirrhosis	Lachnobacterium
320	Liver cirrhosis	Lachnospiraceae bacterium A2
321	Liver cirrhosis	Lactococcus
322	Liver cirrhosis	Mannheimia
323	Liver cirrhosis	Mastodon intestinal bacterium AN-22-6
324	Liver cirrhosis	Mogibacterium
325	Liver cirrhosis	Oligella
326	Liver cirrhosis	Oscillibacter
327	Liver cirrhosis	Oscillospira
328	Liver cirrhosis	Oscillospiraceae bacterium NML 061048
329	Liver cirrhosis	Pantoea
330	Liver cirrhosis	Pasteurella
331	Liver cirrhosis	Pectobacterium
332	Liver cirrhosis	Peptostreptococcus
333	Liver cirrhosis	Pusillimonas
334	Liver cirrhosis	Rumen bacterium 8/94-32
335	Liver cirrhosis	Rumen bacterium R-7
336	Liver cirrhosis	Rumen bacterium R-9
337	Liver cirrhosis	Salmonella
338	Liver cirrhosis	Segmented filamentous bacterium
339	Liver cirrhosis	Serratia
340	Liver cirrhosis	Shigella
341	Liver cirrhosis	Solobacterium
342	Liver cirrhosis	Sutterella
343	Liver cirrhosis	Swine fecal bacterium FPC67
344	Liver cirrhosis	Swine fecal bacterium FPC70
345	Liver cirrhosis	Swine fecal bacterium RF3E-Xyl1
346	Liver cirrhosis	Swine fecal bacterium SD-Pec1
347	Liver cirrhosis	Swine manure pit bacterium PPC108
348	Liver cirrhosis	Tenericutes
349	Liver cirrhosis	Terrahaemophilus
350	Liver cirrhosis	Unidentified bacterium ZF3
351	Liver cirrhosis	Verrucomicrobia
352	Liver cirrhosis	Verrucomicrobia bacterium MS-F-88
353	Liver cirrhosis	Vibrio
354	Liver cirrhosis	Butyrate-producing bacterium L1-952
355	Liver cirrhosis	Yersinia
356	Irritable bowel syndrome(IBS)	Clostridium difficile
357	Irritable bowel syndrome(IBS)	Helicobacter pylori
358	Irritable bowel syndrome(IBS)	Prevotella
359	Irritable bowel syndrome(IBS)	Firmicutes
360	Irritable bowel syndrome(IBS)	Staphylococcus aureus
361	Irritable bowel syndrome(IBS)	Actinobacteria
362	Irritable bowel syndrome(IBS)	Clostridia
363	Irritable bowel syndrome(IBS)	Staphylococcus
364	Irritable bowel syndrome(IBS)	Bifidobacterium
365	Irritable bowel syndrome(IBS)	Lactobacillus
366	Irritable bowel syndrome(IBS)	Escherichia coli
367	Irritable bowel syndrome(IBS)	Stenotrophomonas maltophilia
368	Irritable bowel syndrome(IBS)	Enterococcus
369	Irritable bowel syndrome(IBS)	Burkholderia
370	Bacterial Vaginosis	Proteobacteria
371	Bacterial Vaginosis	Clostridium difficile
372	Irritable bowel syndrome(IBS)	Oxalobacter formigenes
373	Irritable bowel syndrome(IBS)	Prevotella copri
374	Irritable bowel syndrome(IBS)	Tropheryma whipplei
375	Irritable bowel syndrome(IBS)	Klebsiella
376	Irritable bowel syndrome(IBS)	Fusobacterium
377	Irritable bowel syndrome(IBS)	Clostridium leptum
378	Bacterial Vaginosis	Helicobacter pylori
379	Irritable bowel syndrome(IBS)	Streptococcus
380	Irritable bowel syndrome(IBS)	Desulfovibrio
381	Irritable bowel syndrome(IBS)	Acinetobacter
382	Irritable bowel syndrome(IBS)	Corynebacterium
383	Irritable bowel syndrome(IBS)	Faecalibacterium prausnitzii
384	Irritable bowel syndrome(IBS)	Bacteroides uniformis
385	Irritable bowel syndrome(IBS)	Dietzia maris
386	Irritable bowel syndrome(IBS)	Staphylococcus epidermidis
387	Irritable bowel syndrome(IBS)	Bacteroides ovatus
388	Irritable bowel syndrome(IBS)	Pseudomonas
389	Irritable bowel syndrome(IBS)	Fusobacterium nucleatum
390	Irritable bowel syndrome(IBS)	Propionibacterium
391	Irritable bowel syndrome(IBS)	Propionibacterium acnes
392	Irritable bowel syndrome(IBS)	Alcaligenaceae
393	Irritable bowel syndrome(IBS)	Coriobacteriaceae
394	Irritable bowel syndrome(IBS)	Erysipelotrichaceae
395	Irritable bowel syndrome(IBS)	Methanobrevibacter smithii
396	Irritable bowel syndrome(IBS)	Comamonadaceae
397	Irritable bowel syndrome(IBS)	Oxalobacteraceae
398	Irritable bowel syndrome(IBS)	Sphingomonadaceae
399	Irritable bowel syndrome(IBS)	Bacilli
400	Irritable bowel syndrome(IBS)	Xanthomonas
401	Irritable bowel syndrome(IBS)	Lysobacter
402	Irritable bowel syndrome(IBS)	Rickettsiales
403	Irritable bowel syndrome(IBS)	Streptococcus mitis
404	Irritable bowel syndrome(IBS)	Tannerella
405	Irritable bowel syndrome(IBS)	Clostridium
406	Irritable bowel syndrome(IBS)	Verrucomicrobiaceae
407	Irritable bowel syndrome(IBS)	Betaproteobacteria
408	Irritable bowel syndrome(IBS)	Treponema
409	Irritable bowel syndrome(IBS)	Actinomyces
410	Irritable bowel syndrome(IBS)	Porphyromonas gingivalis
411	Irritable bowel syndrome(IBS)	Selenomonas
412	Irritable bowel syndrome(IBS)	Fusobacteriaceae
413	Irritable bowel syndrome(IBS)	Veillonellaceae
414	Irritable bowel syndrome(IBS)	Klebsiella pneumoniae
415	Irritable bowel syndrome(IBS)	Enterobacter aerogenes
416	Irritable bowel syndrome(IBS)	Enterobacter hormaechei
417	Irritable bowel syndrome(IBS)	Shigella dysenteriae
418	Irritable bowel syndrome(IBS)	Bacteroidales
419	Irritable bowel syndrome(IBS)	Enterococcus faecium
420	Irritable bowel syndrome(IBS)	Erysipelotrichales
421	Irritable bowel syndrome(IBS)	Bacteroides fragilis
422	Irritable bowel syndrome(IBS)	Parabacteroides
423	Irritable bowel syndrome(IBS)	Alistipes
424	Irritable bowel syndrome(IBS)	Clostridiales
425	Irritable bowel syndrome(IBS)	Rikenellaceae
426	Irritable bowel syndrome(IBS)	Ruminococcaceae
427	Irritable bowel syndrome(IBS)	Porphyromonas
428	Irritable bowel syndrome(IBS)	Citrobacter
429	Irritable bowel syndrome(IBS)	Alistipes finegoldii
430	Irritable bowel syndrome(IBS)	Alistipes putredinis
431	Irritable bowel syndrome(IBS)	Bacteroides eggerthii
432	Irritable bowel syndrome(IBS)	Bacteroides finegoldii
433	Irritable bowel syndrome(IBS)	Bacteroides sp. D20
434	Irritable bowel syndrome(IBS)	Bilophila
435	Irritable bowel syndrome(IBS)	Bilophila wadsworthia
436	Irritable bowel syndrome(IBS)	Enterococcus faecalis
437	Irritable bowel syndrome(IBS)	Roseburia hominis
438	Irritable bowel syndrome(IBS)	Roseburia intestinalis
439	Irritable bowel syndrome(IBS)	Ruminococcus gnavus
440	Irritable bowel syndrome(IBS)	Streptococcus anginosus
441	Irritable bowel syndrome(IBS)	Streptococcus parasanguinis
442	Irritable bowel syndrome(IBS)	Streptococcus salivarius
443	Irritable bowel syndrome(IBS)	Streptococcus vestibularis
444	Irritable bowel syndrome(IBS)	Veillonella atypica
445	Irritable bowel syndrome(IBS)	Veillonella dispar
446	Irritable bowel syndrome(IBS)	Veillonella parvula
447	Irritable bowel syndrome(IBS)	Eubacterium hallii
448	Irritable bowel syndrome(IBS)	Holdemania
449	Irritable bowel syndrome(IBS)	Lachnospira
450	Irritable bowel syndrome(IBS)	Lactobacillus salivarius
451	Irritable bowel syndrome(IBS)	Odoribacter splanchnicus
452	Irritable bowel syndrome(IBS)	Parabacteroides distasonis
453	Irritable bowel syndrome(IBS)	Parabacteroides merdae
454	Irritable bowel syndrome(IBS)	Megasphaera
455	Bacterial Vaginosis	Bacteroidetes
456	Irritable bowel syndrome(IBS)	Streptobacillus
457	Irritable bowel syndrome(IBS)	Aerococcus
458	Irritable bowel syndrome(IBS)	Atopobium
459	Irritable bowel syndrome(IBS)	Atopobium vaginae
460	Irritable bowel syndrome(IBS)	Candidate division TM7
461	Irritable bowel syndrome(IBS)	Eggerthella
462	Irritable bowel syndrome(IBS)	Gardnerella
463	Irritable bowel syndrome(IBS)	Gardnerella vaginalis
464	Irritable bowel syndrome(IBS)	Lactobacillus crispatus
465	Irritable bowel syndrome(IBS)	Lactobacillus iners
466	Irritable bowel syndrome(IBS)	Leptotrichia
467	Irritable bowel syndrome(IBS)	Leptotrichia amnionii
468	Irritable bowel syndrome(IBS)	Mobiluncus
469	Irritable bowel syndrome(IBS)	Olsenella
470	Irritable bowel syndrome(IBS)	Papillibacter
471	Irritable bowel syndrome(IBS)	Porphyromonas uenonis
472	Irritable bowel syndrome(IBS)	Eubacterium eligens
473	Irritable bowel syndrome(IBS)	Eubacterium rectale
474	Irritable bowel syndrome(IBS)	Faecalibacterium
475	Irritable bowel syndrome(IBS)	Odoribacter
476	Irritable bowel syndrome(IBS)	Roseburia
477	Irritable bowel syndrome(IBS)	Subdoligranulum
478	Irritable bowel syndrome(IBS)	Phascolarctobacterium
479	Irritable bowel syndrome(IBS)	Fusobacteria
480	Irritable bowel syndrome(IBS)	Butyrate-producing bacterium L1-952
481	Irritable bowel syndrome(IBS)	Clostridia bacterium TSW07CA7
482	Irritable bowel syndrome(IBS)	Clostridiaceae bacterium bSSV31
483	Irritable bowel syndrome(IBS)	Clostridiaceae bacterium LEMV63
484	Irritable bowel syndrome(IBS)	Clostridiaceae bacterium SH032
485	Irritable bowel syndrome(IBS)	Clostridiaceae bacterium SK061
486	Irritable bowel syndrome(IBS)	Clostridiales bacterium 80/3
487	Irritable bowel syndrome(IBS)	Clostridiales bacterium A2-162
488	Irritable bowel syndrome(IBS)	Clostridiales bacterium AHT16
489	Irritable bowel syndrome(IBS)	Clostridiales bacterium L2-14
490	Irritable bowel syndrome(IBS)	Clostridium innocuum
491	Irritable bowel syndrome(IBS)	Clostridium ramosum
492	Irritable bowel syndrome(IBS)	Clostridium spiroforme
493	Irritable bowel syndrome(IBS)	Collinsella
494	Irritable bowel syndrome(IBS)	Coprobacillus
495	Irritable bowel syndrome(IBS)	Cronobacter
496	Irritable bowel syndrome(IBS)	Dehalobacterium
497	Irritable bowel syndrome(IBS)	Desulfotomaculum
498	Irritable bowel syndrome(IBS)	Dialister
499	Irritable bowel syndrome(IBS)	Eubacterium tortuosum
500	Irritable bowel syndrome(IBS)	Firmicutes bacterium EG14
501	Irritable bowel syndrome(IBS)	Firmicutes str. C29
502	Irritable bowel syndrome(IBS)	Gram-negative bacterium cL10-2b-4
503	Irritable bowel syndrome(IBS)	Hafnia
504	Irritable bowel syndrome(IBS)	Human intestinal firmicute CB47
505	Irritable bowel syndrome(IBS)	Human intestinal firmicute CO13
506	Irritable bowel syndrome(IBS)	Human intestinal firmicute CO19
507	Irritable bowel syndrome(IBS)	Human intestinal firmicute CO2
508	Irritable bowel syndrome(IBS)	Human intestinal firmicute CO35
509	Irritable bowel syndrome(IBS)	Human intestinal firmicute CO4
510	Irritable bowel syndrome(IBS)	Human intestinal firmicute CS26
511	Irritable bowel syndrome(IBS)	Lachnobacterium
512	Irritable bowel syndrome(IBS)	Lachnospiraceae bacterium A2
513	Irritable bowel syndrome(IBS)	Lactococcus
514	Irritable bowel syndrome(IBS)	Yersinia
515	Irritable bowel syndrome(IBS)	Acetonema
516	Irritable bowel syndrome(IBS)	Actinobacillus
517	Irritable bowel syndrome(IBS)	Aggregatibacter
518	Irritable bowel syndrome(IBS)	Akkermansia
519	Irritable bowel syndrome(IBS)	Anaerofilum
520	Irritable bowel syndrome(IBS)	Anaerostipes
521	Irritable bowel syndrome(IBS)	Anaerotruncus
522	Irritable bowel syndrome(IBS)	Bacillus
523	Irritable bowel syndrome(IBS)	Bacterium 08.96.4
524	Irritable bowel syndrome(IBS)	Bacterium ASF500
525	Irritable bowel syndrome(IBS)	Bacterium B4C2-5
526	Irritable bowel syndrome(IBS)	Bacterium Ba2
527	Irritable bowel syndrome(IBS)	Bacterium C15
528	Irritable bowel syndrome(IBS)	Bacterium G100VIII
529	Irritable bowel syndrome(IBS)	Bacterium ic1214
530	Irritable bowel syndrome(IBS)	Bacterium ic1258
531	Irritable bowel syndrome(IBS)	Bacterium ic1292
532	Irritable bowel syndrome(IBS)	Bacterium ic1296
533	Irritable bowel syndrome(IBS)	Bacterium ic1311
534	Irritable bowel syndrome(IBS)	Bacterium ic1379
535	Irritable bowel syndrome(IBS)	Bacterium ic1391
536	Irritable bowel syndrome(IBS)	Bacterium MB7-1
537	Irritable bowel syndrome(IBS)	Bacterium mpn-isolate group 19
538	Irritable bowel syndrome(IBS)	Bacterium mpn-isolate group 22
539	Irritable bowel syndrome(IBS)	Bacterium mpn-isolate group 24
540	Irritable bowel syndrome(IBS)	Bacterium mpn-isolate group 27
541	Irritable bowel syndrome(IBS)	Bacterium mpn-isolate group 5
542	Irritable bowel syndrome(IBS)	Bacterium 'New Zealand B'
543	Irritable bowel syndrome(IBS)	Bacterium str. 31285
544	Irritable bowel syndrome(IBS)	Bacterium YE62
545	Irritable bowel syndrome(IBS)	Bacterium YE64
546	Irritable bowel syndrome(IBS)	Bacteroidaceae bacterium Smarlab 3301643
547	Irritable bowel syndrome(IBS)	Bacteroides sp. CJ78
548	Irritable bowel syndrome(IBS)	Bacteroides thetaiotaomicron
549	Irritable bowel syndrome(IBS)	Bovine rumen bacterium JPR13
550	Irritable bowel syndrome(IBS)	Brenneria
551	Irritable bowel syndrome(IBS)	Burkholderiales bacterium Smarlab 3302047
552	Irritable bowel syndrome(IBS)	Butyrate-producing bacterium ART55/1
553	Irritable bowel syndrome(IBS)	Butyrate-producing bacterium L1-810
554	Irritable bowel syndrome(IBS)	Butyrate-producing bacterium L2-50
555	Irritable bowel syndrome(IBS)	Butyrate-producing bacterium M104/1
556	Irritable bowel syndrome(IBS)	Butyrate-producing bacterium M21/2
557	Irritable bowel syndrome(IBS)	Butyrate-producing bacterium M50/1
558	Irritable bowel syndrome(IBS)	Butyrate-producing bacterium P607
559	Irritable bowel syndrome(IBS)	Butyrate-producing bacterium PH05YB02
560	Irritable bowel syndrome(IBS)	Butyrate-producing bacterium Ph07AY02
561	Irritable bowel syndrome(IBS)	Butyrate-producing bacterium PH07AY3
562	Irritable bowel syndrome(IBS)	Butyrate-producing bacterium PH07AY5
563	Irritable bowel syndrome(IBS)	Butyrate-producing bacterium PH07BY04
564	Irritable bowel syndrome(IBS)	Butyrate-producing bacterium SL6/1/1
565	Irritable bowel syndrome(IBS)	Butyrate-producing bacterium SM4/1
566	Irritable bowel syndrome(IBS)	Butyrate-producing bacterium SR1/1
567	Irritable bowel syndrome(IBS)	Butyrate-producing bacterium SR1/5
568	Irritable bowel syndrome(IBS)	Butyrate-producing bacterium SS2/1
569	Irritable bowel syndrome(IBS)	Butyrate-producing bacterium SSC/2
570	Irritable bowel syndrome(IBS)	Butyrate-producing bacterium T2-132
571	Irritable bowel syndrome(IBS)	Dysgonomonas
572	Irritable bowel syndrome(IBS)	Edwardsiella
573	Irritable bowel syndrome(IBS)	Enterobacter
574	Irritable bowel syndrome(IBS)	Erwinia
575	Irritable bowel syndrome(IBS)	Erysipelothrix
576	Irritable bowel syndrome(IBS)	Escherichia
577	Irritable bowel syndrome(IBS)	Mannheimia
578	Irritable bowel syndrome(IBS)	Mastodon intestinal bacterium AN-22-6
579	Irritable bowel syndrome(IBS)	Mogibacterium
580	Irritable bowel syndrome(IBS)	Oligella
581	Irritable bowel syndrome(IBS)	Oscillibacter
582	Irritable bowel syndrome(IBS)	Oscillospira
583	Irritable bowel syndrome(IBS)	Oscillospiraceae bacterium NML 061048
584	Irritable bowel syndrome(IBS)	Pantoea
585	Irritable bowel syndrome(IBS)	Pasteurella
586	Irritable bowel syndrome(IBS)	Pectobacterium
587	Irritable bowel syndrome(IBS)	Peptostreptococcus
588	Irritable bowel syndrome(IBS)	Pusillimonas
589	Irritable bowel syndrome(IBS)	Rumen bacterium 8/94-32
590	Irritable bowel syndrome(IBS)	Rumen bacterium R-7
591	Irritable bowel syndrome(IBS)	Rumen bacterium R-9
592	Irritable bowel syndrome(IBS)	Salmonella
593	Irritable bowel syndrome(IBS)	Segmented filamentous bacterium
594	Irritable bowel syndrome(IBS)	Serratia
595	Irritable bowel syndrome(IBS)	Shigella
596	Irritable bowel syndrome(IBS)	Solobacterium
597	Irritable bowel syndrome(IBS)	Sutterella
598	Irritable bowel syndrome(IBS)	Swine fecal bacterium FPC67
599	Irritable bowel syndrome(IBS)	Swine fecal bacterium FPC70
600	Irritable bowel syndrome(IBS)	Swine fecal bacterium RF3E-Xyl1
601	Irritable bowel syndrome(IBS)	Swine fecal bacterium SD-Pec1
602	Irritable bowel syndrome(IBS)	Swine manure pit bacterium PPC108
603	Irritable bowel syndrome(IBS)	Tenericutes
604	Irritable bowel syndrome(IBS)	Terrahaemophilus
605	Irritable bowel syndrome(IBS)	Unidentified bacterium ZF3
606	Irritable bowel syndrome(IBS)	Verrucomicrobia
607	Irritable bowel syndrome(IBS)	Verrucomicrobia bacterium MS-F-88
608	Irritable bowel syndrome(IBS)	Vibrio
609	Irritable bowel syndrome(IBS)	Shuttleworthia
610	Bacterial Vaginosis	Clostridium coccoides
611	Bacterial Vaginosis	Staphylococcus aureus
612	Bacterial Vaginosis	Clostridia
613	Bacterial Vaginosis	Lachnospiraceae
614	Bacterial Vaginosis	Bifidobacterium
615	Bacterial Vaginosis	Haemophilus
616	Bacterial Vaginosis	Staphylococcus
617	Bacterial Vaginosis	Bacteroides
618	Bacterial Vaginosis	Enterobacteriaceae
619	Bacterial Vaginosis	Escherichia coli
620	Bacterial Vaginosis	Stenotrophomonas maltophilia
621	Bacterial Vaginosis	Burkholderia
622	Bacterial Vaginosis	Enterococcus
623	Bacterial Vaginosis	Veillonella
624	Bacterial Vaginosis	Klebsiella
625	Bacterial Vaginosis	Oxalobacter formigenes
626	Bacterial Vaginosis	Prevotella copri
627	Bacterial Vaginosis	Tropheryma whipplei
628	Bacterial Vaginosis	Fusobacterium
629	Bacterial Vaginosis	Streptococcus
630	Bacterial Vaginosis	Collinsella aerofaciens
631	Bacterial Vaginosis	Clostridium leptum
632	Bacterial Vaginosis	Desulfovibrio
633	Bacterial Vaginosis	Acinetobacter
634	Bacterial Vaginosis	Corynebacterium
635	Bacterial Vaginosis	Faecalibacterium prausnitzii
636	Bacterial Vaginosis	Bacteroides uniformis
637	Bacterial Vaginosis	Bacteroides ovatus
638	Bacterial Vaginosis	Bacteroides vulgatus
639	Bacterial Vaginosis	Dietzia maris
640	Bacterial Vaginosis	Staphylococcus epidermidis
641	Bacterial Vaginosis	Pseudomonas
642	Bacterial Vaginosis	Fusobacterium nucleatum
643	Bacterial Vaginosis	Propionibacterium
644	Bacterial Vaginosis	Propionibacterium acnes
645	Crohn's disease(CD)	Proteobacteria
646	Bacterial Vaginosis	Alcaligenaceae
647	Bacterial Vaginosis	Coriobacteriaceae
648	Bacterial Vaginosis	Erysipelotrichaceae
649	Bacterial Vaginosis	Methanobrevibacter smithii
650	Bacterial Vaginosis	Oxalobacteraceae
651	Bacterial Vaginosis	Sphingomonadaceae
652	Bacterial Vaginosis	Comamonadaceae
653	Bacterial Vaginosis	Bacilli
654	Bacterial Vaginosis	Prevotellaceae
655	Bacterial Vaginosis	Xanthomonas
656	Bacterial Vaginosis	Lysobacter
657	Bacterial Vaginosis	Rickettsiales
658	Bacterial Vaginosis	Streptococcus mitis
659	Bacterial Vaginosis	Coxiellaceae
660	Bacterial Vaginosis	Treponema
661	Bacterial Vaginosis	Actinomyces
662	Bacterial Vaginosis	Porphyromonas gingivalis
663	Bacterial Vaginosis	Selenomonas
664	Bacterial Vaginosis	Verrucomicrobiaceae
665	Bacterial Vaginosis	Tannerella
666	Crohn's disease(CD)	Clostridium difficile
667	Bacterial Vaginosis	Bacteroides fragilis
668	Bacterial Vaginosis	Bacteroidales
669	Bacterial Vaginosis	Enterococcus faecium
670	Bacterial Vaginosis	Erysipelotrichales
671	Bacterial Vaginosis	Fusobacteriaceae
672	Bacterial Vaginosis	Veillonellaceae
673	Bacterial Vaginosis	Enterobacter aerogenes
674	Bacterial Vaginosis	Enterobacter hormaechei
675	Bacterial Vaginosis	Klebsiella pneumoniae
676	Bacterial Vaginosis	Shigella dysenteriae
677	Periodontal	Proteobacteria
678	Crohn's disease(CD)	Helicobacter pylori
679	Necrotizing Enterocolitis	Clostridium difficile
680	Bacterial Vaginosis	Porphyromonas
681	Bacterial Vaginosis	Alistipes
682	Bacterial Vaginosis	Parabacteroides
683	Bacterial Vaginosis	Gammaproteobacteria
684	Bacterial Vaginosis	Bacteroidaceae
685	Bacterial Vaginosis	Rikenellaceae
686	Bacterial Vaginosis	Ruminococcaceae
687	Bacterial Vaginosis	Porphyromonadaceae
688	Necrotizing Enterocolitis	Helicobacter pylori
689	Bacterial Vaginosis	Citrobacter
690	Periodontal	Clostridium difficile
691	Bacterial Vaginosis	Alistipes finegoldii
692	Bacterial Vaginosis	Alistipes putredinis
693	Bacterial Vaginosis	Bacteroides eggerthii
694	Bacterial Vaginosis	Bacteroides finegoldii
695	Bacterial Vaginosis	Bacteroides sp. D20
696	Bacterial Vaginosis	Bilophila
697	Bacterial Vaginosis	Bilophila wadsworthia
698	Bacterial Vaginosis	Enterococcus faecalis
699	Bacterial Vaginosis	Eubacterium hallii
700	Bacterial Vaginosis	Holdemania
701	Bacterial Vaginosis	Lachnospira
702	Bacterial Vaginosis	Lactobacillus salivarius
703	Bacterial Vaginosis	Odoribacter splanchnicus
704	Bacterial Vaginosis	Parabacteroides distasonis
705	Bacterial Vaginosis	Parabacteroides merdae
706	Bacterial Vaginosis	Roseburia hominis
707	Bacterial Vaginosis	Roseburia intestinalis
708	Bacterial Vaginosis	Ruminococcus gnavus
709	Bacterial Vaginosis	Streptococcus anginosus
710	Bacterial Vaginosis	Streptococcus parasanguinis
711	Bacterial Vaginosis	Streptococcus salivarius
712	Bacterial Vaginosis	Streptococcus vestibularis
713	Bacterial Vaginosis	Veillonella atypica
714	Bacterial Vaginosis	Veillonella dispar
715	Bacterial Vaginosis	Veillonella parvula
716	Bacterial Vaginosis	Nitrospiraceae
717	Bacterial Vaginosis	Paenibacillaceae
718	Bacterial Vaginosis	Peptostreptococcaceae
719	Bacterial Vaginosis	Polyangiaceae
720	Bacterial Vaginosis	Promicromonosporaceae
721	Bacterial Vaginosis	Ruminococcus productus
722	Bacterial Vaginosis	Acidobacteriaceae
723	Bacterial Vaginosis	Aeromonadaceae
724	Bacterial Vaginosis	Alteromonadaceae
725	Bacterial Vaginosis	Anaerovorax
726	Bacterial Vaginosis	Bacillaceae
727	Bacterial Vaginosis	Bifidobacterium catenulatum
728	Bacterial Vaginosis	Cellulomonadaceae
729	Bacterial Vaginosis	Clostridiaceae
730	Bacterial Vaginosis	Clostridium cocleatum
731	Bacterial Vaginosis	Desulfobacteraceae
732	Bacterial Vaginosis	Desulfovibrionaceae
733	Bacterial Vaginosis	Syntrophobacteraceae
734	Bacterial Vaginosis	Thiotrichaceae
735	Cystic fibrosis	Proteobacteria
736	Periodontal	Helicobacter pylori
737	Bacterial Vaginosis	Coprococcus
738	Bacterial Vaginosis	Dorea
739	Bacterial Vaginosis	Haemophilus parainfluenzae
740	Bacterial Vaginosis	Pasteurellaceae
741	Bacterial Vaginosis	Ruminococcus
742	Bacterial Vaginosis	Streptococcaceae
743	Clostridium difficile infection(CDI)	Clostridium difficile
744	Obesity	Proteobacteria
745	Bacterial Vaginosis	Eubacterium eligens
746	Bacterial Vaginosis	Eubacterium rectale
747	Bacterial Vaginosis	Faecalibacterium
748	Bacterial Vaginosis	Odoribacter
749	Bacterial Vaginosis	Phascolarctobacterium
750	Bacterial Vaginosis	Roseburia
751	Bacterial Vaginosis	Subdoligranulum
752	Bacterial Vaginosis	Eubacterium
753	Bacterial Vaginosis	Eubacterium tortuosum
754	Bacterial Vaginosis	Firmicutes bacterium EG14
755	Bacterial Vaginosis	Firmicutes str. C29
756	Bacterial Vaginosis	Gram-negative bacterium cL10-2b-4
757	Bacterial Vaginosis	Hafnia
758	Bacterial Vaginosis	Human intestinal firmicute CB47
759	Bacterial Vaginosis	Human intestinal firmicute CO13
760	Bacterial Vaginosis	Human intestinal firmicute CO19
761	Bacterial Vaginosis	Human intestinal firmicute CO2
762	Bacterial Vaginosis	Human intestinal firmicute CO35
763	Bacterial Vaginosis	Human intestinal firmicute CO4
764	Bacterial Vaginosis	Human intestinal firmicute CS26
765	Bacterial Vaginosis	Lachnobacterium
766	Bacterial Vaginosis	Lachnospiraceae bacterium A2
767	Bacterial Vaginosis	Lactococcus
768	Bacterial Vaginosis	Mannheimia
769	Bacterial Vaginosis	Mastodon intestinal bacterium AN-22-6
770	Bacterial Vaginosis	Mogibacterium
771	Bacterial Vaginosis	Oligella
772	Bacterial Vaginosis	Oscillibacter
773	Bacterial Vaginosis	Oscillospira
774	Bacterial Vaginosis	Oscillospiraceae bacterium NML 061048
775	Bacterial Vaginosis	Pantoea
776	Bacterial Vaginosis	Yersinia
777	Bacterial Vaginosis	Butyrate-producing bacterium L1-952
778	Bacterial Vaginosis	Pasteurella
779	Bacterial Vaginosis	Pectobacterium
780	Bacterial Vaginosis	Peptostreptococcus
781	Bacterial Vaginosis	Pusillimonas
782	Bacterial Vaginosis	Rumen bacterium 8/94-32
783	Bacterial Vaginosis	Rumen bacterium R-7
784	Bacterial Vaginosis	Rumen bacterium R-9
785	Bacterial Vaginosis	Salmonella
786	Bacterial Vaginosis	Segmented filamentous bacterium
787	Bacterial Vaginosis	Serratia
788	Bacterial Vaginosis	Shigella
789	Bacterial Vaginosis	Solobacterium
790	Bacterial Vaginosis	Sutterella
791	Bacterial Vaginosis	Swine fecal bacterium FPC67
792	Bacterial Vaginosis	Swine fecal bacterium FPC70
793	Bacterial Vaginosis	Swine fecal bacterium RF3E-Xyl1
794	Bacterial Vaginosis	Swine fecal bacterium SD-Pec1
795	Bacterial Vaginosis	Swine manure pit bacterium PPC108
796	Bacterial Vaginosis	Tenericutes
797	Bacterial Vaginosis	Terrahaemophilus
798	Bacterial Vaginosis	Acetonema
799	Bacterial Vaginosis	Actinobacillus
800	Bacterial Vaginosis	Aggregatibacter
801	Bacterial Vaginosis	Akkermansia
802	Bacterial Vaginosis	Anaerofilum
803	Bacterial Vaginosis	Anaerostipes
804	Bacterial Vaginosis	Anaerotruncus
805	Bacterial Vaginosis	Bacillus
806	Bacterial Vaginosis	Bacterium 08.96.4
807	Bacterial Vaginosis	Bacterium ASF500
808	Bacterial Vaginosis	Bacterium B4C2-5
809	Bacterial Vaginosis	Bacterium Ba2
810	Bacterial Vaginosis	Bacterium C15
811	Bacterial Vaginosis	Bacterium G100VIII
812	Bacterial Vaginosis	Bacterium ic1214
813	Bacterial Vaginosis	Bacterium ic1258
814	Bacterial Vaginosis	Bacterium ic1292
815	Bacterial Vaginosis	Bacterium ic1296
816	Bacterial Vaginosis	Bacterium ic1311
817	Bacterial Vaginosis	Bacterium ic1379
818	Bacterial Vaginosis	Bacterium ic1391
819	Bacterial Vaginosis	Bacterium MB7-1
820	Bacterial Vaginosis	Bacterium mpn-isolate group 19
821	Bacterial Vaginosis	Bacterium mpn-isolate group 22
822	Bacterial Vaginosis	Bacterium mpn-isolate group 24
823	Bacterial Vaginosis	Bacterium mpn-isolate group 27
824	Bacterial Vaginosis	Bacterium mpn-isolate group 5
825	Bacterial Vaginosis	Bacterium 'New Zealand B'
826	Bacterial Vaginosis	Bacterium str. 31285
827	Bacterial Vaginosis	Bacterium YE62
828	Bacterial Vaginosis	Bacterium YE64
829	Bacterial Vaginosis	Bacteroidaceae bacterium Smarlab 3301643
830	Bacterial Vaginosis	Bacteroides sp. CJ78
831	Bacterial Vaginosis	Bacteroides thetaiotaomicron
832	Bacterial Vaginosis	Bovine rumen bacterium JPR13
833	Bacterial Vaginosis	Brenneria
834	Bacterial Vaginosis	Burkholderiales bacterium Smarlab 3302047
835	Bacterial Vaginosis	Butyrate-producing bacterium ART55/1
836	Bacterial Vaginosis	Butyrate-producing bacterium L1-810
837	Bacterial Vaginosis	Butyrate-producing bacterium L2-50
838	Bacterial Vaginosis	Butyrate-producing bacterium M104/1
839	Bacterial Vaginosis	Butyrate-producing bacterium M21/2
840	Bacterial Vaginosis	Butyrate-producing bacterium M50/1
841	Bacterial Vaginosis	Butyrate-producing bacterium P607
842	Bacterial Vaginosis	Butyrate-producing bacterium PH05YB02
843	Bacterial Vaginosis	Butyrate-producing bacterium Ph07AY02
844	Bacterial Vaginosis	Butyrate-producing bacterium PH07AY3
845	Bacterial Vaginosis	Butyrate-producing bacterium PH07AY5
846	Bacterial Vaginosis	Butyrate-producing bacterium PH07BY04
847	Bacterial Vaginosis	Butyrate-producing bacterium SL6/1/1
848	Bacterial Vaginosis	Butyrate-producing bacterium SM4/1
849	Bacterial Vaginosis	Butyrate-producing bacterium SR1/1
850	Bacterial Vaginosis	Butyrate-producing bacterium SR1/5
851	Bacterial Vaginosis	Butyrate-producing bacterium SS2/1
852	Bacterial Vaginosis	Butyrate-producing bacterium SSC/2
853	Bacterial Vaginosis	Butyrate-producing bacterium T2-132
854	Bacterial Vaginosis	Clostridia bacterium TSW07CA7
855	Bacterial Vaginosis	Clostridiaceae bacterium bSSV31
856	Bacterial Vaginosis	Clostridiaceae bacterium LEMV63
857	Bacterial Vaginosis	Clostridiaceae bacterium SH032
858	Bacterial Vaginosis	Clostridiaceae bacterium SK061
859	Bacterial Vaginosis	Clostridiales bacterium 80/3
860	Bacterial Vaginosis	Clostridiales bacterium A2-162
861	Bacterial Vaginosis	Clostridiales bacterium AHT16
862	Bacterial Vaginosis	Clostridiales bacterium L2-14
863	Bacterial Vaginosis	Clostridium innocuum
864	Bacterial Vaginosis	Clostridium ramosum
865	Bacterial Vaginosis	Clostridium spiroforme
866	Bacterial Vaginosis	Collinsella
867	Bacterial Vaginosis	Coprobacillus
868	Bacterial Vaginosis	Cronobacter
869	Bacterial Vaginosis	Dehalobacterium
870	Bacterial Vaginosis	Desulfotomaculum
871	Bacterial Vaginosis	Dialister
872	Bacterial Vaginosis	Dysgonomonas
873	Bacterial Vaginosis	Edwardsiella
874	Bacterial Vaginosis	Enterobacter
875	Bacterial Vaginosis	Erwinia
876	Bacterial Vaginosis	Erysipelothrix
877	Bacterial Vaginosis	Escherichia
878	Bacterial Vaginosis	Unidentified bacterium ZF3
879	Bacterial Vaginosis	Verrucomicrobia
880	Bacterial Vaginosis	Verrucomicrobia bacterium MS-F-88
881	Bacterial Vaginosis	Vibrio
882	Bacterial Vaginosis	Eubacteriaceae
883	Cystic fibrosis	Clostridium difficile
884	Clostridium difficile infection(CDI)	Helicobacter pylori
885	Cystic fibrosis	Helicobacter pylori
886	Crohn's disease(CD)	Prevotella
887	Crohn's disease(CD)	Bacteroidetes
888	Obesity	Clostridium difficile
889	Necrotizing Enterocolitis	Prevotella
890	Ileal Crohn's disease(CD)	Proteobacteria
891	Obesity	Helicobacter pylori
892	Periodontal	Bacteroidetes
893	Colorectal carcinoma	Proteobacteria
894	Ileal Crohn's disease(CD)	Clostridium difficile
895	Clostridium difficile infection(CDI)	Prevotella
896	Asthma	Clostridium difficile
897	Atopic dermatitis	Proteobacteria
898	Ileal Crohn's disease(CD)	Helicobacter pylori
899	Periodontal	Firmicutes
900	Cystic fibrosis	Prevotella
901	Psoriasis	Clostridium difficile
902	Cystic fibrosis	Bacteroidetes
903	Type 2 diabetes	Clostridium difficile
904	Skin and mucosal infections	Proteobacteria
905	Psoriasis	Helicobacter pylori
906	Atopic dermatitis	Helicobacter pylori
907	Type 2 diabetes	Helicobacter pylori
908	Diarrhea Irritable bowel syndrome(IBS)	Proteobacteria
909	Systemic inflammatory response syndrome	Proteobacteria
910	Crohn's disease(CD)	Clostridium coccoides
911	Skin and mucosal infections	Clostridium difficile
912	Colorectal carcinoma	Clostridium difficile
913	Cystic fibrosis	Firmicutes
914	Crohn's disease(CD)	Staphylococcus aureus
915	COPD	Clostridium difficile
916	Kidney stones	Proteobacteria
917	New-onset untreated rheumatoid arthrits	Proteobacteria
918	Whipple's disease	Proteobacteria
919	Colorectal carcinoma	Helicobacter pylori
920	Diarrhea Irritable bowel syndrome(IBS)	Clostridium difficile
921	Skin and mucosal infections	Helicobacter pylori
922	Necrotizing Enterocolitis	Clostridium coccoides
923	Rheumatoid arthrits	Proteobacteria
924	Obesity	Prevotella
925	Necrotizing Enterocolitis	Staphylococcus aureus
926	COPD	Helicobacter pylori
927	Colon cancer	Proteobacteria
928	Systemic inflammatory response syndrome	Clostridium difficile
929	Crohn's disease(CD)	Actinobacteria
930	Eczema	Proteobacteria
931	Diarrhea Irritable bowel syndrome(IBS)	Helicobacter pylori
932	Constipation Irritable bowel syndrome(IBS)	Proteobacteria
933	Atopy	Proteobacteria
934	Infectious colitis	Proteobacteria
935	Systemic inflammatory response syndrome	Helicobacter pylori
936	Kidney stones	Clostridium difficile
937	New-onset untreated rheumatoid arthrits	Clostridium difficile
938	Whipple's disease	Clostridium difficile
939	Guttate psoriasis	Proteobacteria
940	Allergic asthma	Proteobacteria
941	Allergy	Proteobacteria
942	Gastric and duodenal ulcer	Proteobacteria
943	Gastro-oesophageal reflux	Proteobacteria
944	Allergic sensitization	Proteobacteria
945	Atopic sensitisation	Proteobacteria
946	Recurrent wheeze	Proteobacteria
947	Rheumatoid arthrits	Clostridium difficile
948	Colon cancer	Clostridium difficile
949	Kidney stones	Helicobacter pylori
950	New-onset untreated rheumatoid arthrits	Helicobacter pylori
951	Whipple's disease	Helicobacter pylori
952	Periodontal	Clostridium coccoides
953	Periodontal	Staphylococcus aureus
954	Rheumatoid arthrits	Helicobacter pylori
955	Ileal Crohn's disease(CD)	Bacteroidetes
956	Atopy	Clostridium difficile
957	Colon cancer	Helicobacter pylori
958	Constipation Irritable bowel syndrome(IBS)	Clostridium difficile
959	Infectious colitis	Clostridium difficile
960	Eczema	Helicobacter pylori
961	Inflammatory bowel disease(IBD)	Clostridium difficile
962	Guttate psoriasis	Clostridium difficile
963	Ulcerative colitis	Clostridium difficile
964	Psoriasis	Bacteroidetes
965	Clostridium difficile infection(CDI)	Clostridium coccoides
966	Allergic asthma	Clostridium difficile
967	Allergy	Clostridium difficile
968	Gastric and duodenal ulcer	Clostridium difficile
969	Gastro-oesophageal reflux	Clostridium difficile
970	Periodontal	Actinobacteria
971	Atopy	Helicobacter pylori
972	Clostridium difficile infection(CDI)	Staphylococcus aureus
973	Constipation Irritable bowel syndrome(IBS)	Helicobacter pylori
974	Infectious colitis	Helicobacter pylori
975	Inflammatory bowel disease(IBD)	Helicobacter pylori
976	Ulcerative colitis	Helicobacter pylori
977	Guttate psoriasis	Helicobacter pylori
978	Clostridium difficile infection(CDI)	Actinobacteria
979	Type 2 diabetes	Prevotella
980	Allergic sensitization	Helicobacter pylori
981	Atopic sensitisation	Helicobacter pylori
982	Recurrent wheeze	Helicobacter pylori
983	Cystic fibrosis	Clostridium coccoides
984	Psoriasis	Prevotella
985	Ileal Crohn's disease(CD)	Firmicutes
986	Asthma	Firmicutes
987	Atopic dermatitis	Prevotella
988	Crohn's disease(CD)	Clostridia
989	Atopic dermatitis	Bacteroidetes
990	Cystic fibrosis	Actinobacteria
991	Necrotizing Enterocolitis	Clostridia
992	Crohn's disease(CD)	Lachnospiraceae
993	Skin and mucosal infections	Prevotella
994	Skin and mucosal infections	Bacteroidetes
995	Atopic dermatitis	Firmicutes
996	Diarrhea Irritable bowel syndrome(IBS)	Prevotella
997	Obesity	Clostridium coccoides
998	Diarrhea Irritable bowel syndrome(IBS)	Bacteroidetes
999	Necrotizing Enterocolitis	Lachnospiraceae
1000	Systemic inflammatory response syndrome	Prevotella
1001	Systemic inflammatory response syndrome	Bacteroidetes
1002	Periodontal	Clostridia
1003	Crohn's disease(CD)	Bifidobacterium
1004	Obesity	Actinobacteria
1005	COPD	Firmicutes
1006	Skin and mucosal infections	Firmicutes
1007	Crohn's disease(CD)	Lactobacillus
1008	Crohn's disease(CD)	Haemophilus
1009	Kidney stones	Prevotella
1010	New-onset untreated rheumatoid arthrits	Prevotella
1011	Whipple's disease	Prevotella
1012	Clostridium difficile infection(CDI)	Clostridia
1013	Necrotizing Enterocolitis	Bifidobacterium
1014	Kidney stones	Bacteroidetes
1015	New-onset untreated rheumatoid arthrits	Bacteroidetes
1016	Whipple's disease	Bacteroidetes
1017	Crohn's disease(CD)	Bacteroides
1018	Necrotizing Enterocolitis	Haemophilus
1019	Inflammatory bowel disease(IBD)	Bacteroidetes
1020	Rheumatoid arthrits	Bacteroidetes
1021	Diarrhea Irritable bowel syndrome(IBS)	Firmicutes
1022	Colon cancer	Prevotella
1023	Necrotizing Enterocolitis	Lactobacillus
1024	Ulcerative colitis	Bacteroidetes
1025	Eczema	Prevotella
1026	Crohn's disease(CD)	Staphylococcus
1027	Systemic inflammatory response syndrome	Firmicutes
1028	Colon cancer	Bacteroidetes
1029	Necrotizing Enterocolitis	Bacteroides
1030	Eczema	Bacteroidetes
1031	Periodontal	Lachnospiraceae
1032	Atopy	Prevotella
1033	Atopy	Bacteroidetes
1034	Infectious colitis	Prevotella
1035	Inflammatory bowel disease(IBD)	Prevotella
1036	Constipation Irritable bowel syndrome(IBS)	Bacteroidetes
1037	Infectious colitis	Bacteroidetes
1038	Constipation Irritable bowel syndrome(IBS)	Prevotella
1039	Cystic fibrosis	Clostridia
1040	Ulcerative colitis	Prevotella
1041	Ileal Crohn's disease(CD)	Staphylococcus aureus
1042	Asthma	Clostridium coccoides
1043	Guttate psoriasis	Prevotella
1044	Asthma	Staphylococcus aureus
1045	Allergy	Prevotella
1046	Gastric and duodenal ulcer	Prevotella
1047	Gastro-oesophageal reflux	Prevotella
1048	Allergic asthma	Prevotella
1049	Allergic sensitization	Prevotella
1050	Atopic sensitisation	Prevotella
1051	Recurrent wheeze	Prevotella
1052	Guttate psoriasis	Bacteroidetes
1053	Kidney stones	Firmicutes
1054	New-onset untreated rheumatoid arthrits	Firmicutes
1055	Whipple's disease	Firmicutes
1056	Allergic asthma	Bacteroidetes
1057	Allergy	Bacteroidetes
1058	Gastric and duodenal ulcer	Bacteroidetes
1059	Gastro-oesophageal reflux	Bacteroidetes
1060	Allergic sensitization	Bacteroidetes
1061	Atopic sensitisation	Bacteroidetes
1062	Recurrent wheeze	Bacteroidetes
1063	Periodontal	Bifidobacterium
1064	Ileal Crohn's disease(CD)	Actinobacteria
1065	Rheumatoid arthrits	Firmicutes
1066	Asthma	Actinobacteria
1067	Crohn's disease(CD)	Veillonella
1068	Colon cancer	Firmicutes
1069	Eczema	Firmicutes
1070	Periodontal	Lactobacillus
1071	Periodontal	Bacteroides
1072	Clostridium difficile infection(CDI)	Bifidobacterium
1073	Atopy	Firmicutes
1074	Crohn's disease(CD)	Stenotrophomonas maltophilia
1075	Psoriasis	Clostridium coccoides
1076	Inflammatory bowel disease(IBD)	Firmicutes
1077	Clostridium difficile infection(CDI)	Haemophilus
1078	Psoriasis	Staphylococcus aureus
1079	Ulcerative colitis	Firmicutes
1080	Type 2 diabetes	Staphylococcus aureus
1081	Atopic dermatitis	Clostridium coccoides
1082	Cystic fibrosis	Lachnospiraceae
1083	Infectious colitis	Firmicutes
1084	Constipation Irritable bowel syndrome(IBS)	Firmicutes
1085	Crohn's disease(CD)	Enterococcus
1086	Clostridium difficile infection(CDI)	Lactobacillus
1087	Necrotizing Enterocolitis	Escherichia coli
1088	Guttate psoriasis	Firmicutes
1089	Periodontal	Staphylococcus
1090	Clostridium difficile infection(CDI)	Bacteroides
1091	Crohn's disease(CD)	Burkholderia
1092	Necrotizing Enterocolitis	Stenotrophomonas maltophilia
1093	Type 2 diabetes	Actinobacteria
1094	Allergic asthma	Firmicutes
1095	Allergy	Firmicutes
1096	Gastric and duodenal ulcer	Firmicutes
1097	Gastro-oesophageal reflux	Firmicutes
1098	Allergic sensitization	Firmicutes
1099	Atopic sensitisation	Firmicutes
1100	Recurrent wheeze	Firmicutes
1101	Crohn's disease(CD)	Klebsiella
1102	Periodontal	Enterobacteriaceae
1103	Obesity	Clostridia
1104	Atopic dermatitis	Actinobacteria
1105	Crohn's disease(CD)	Fusobacterium
1106	Crohn's disease(CD)	Streptococcus
1107	Cystic fibrosis	Bifidobacterium
1108	Necrotizing Enterocolitis	Burkholderia
1109	Clostridium difficile infection(CDI)	Staphylococcus
1110	Colorectal carcinoma	Clostridium coccoides
1111	Clostridium difficile infection(CDI)	Enterobacteriaceae
1112	Cystic fibrosis	Haemophilus
1113	Colorectal carcinoma	Staphylococcus aureus
1114	Necrotizing Enterocolitis	Streptococcus
1115	Skin and mucosal infections	Clostridium coccoides
1116	Skin and mucosal infections	Staphylococcus aureus
1117	Necrotizing Enterocolitis	Fusobacterium
1118	Crohn's disease(CD)	Oxalobacter formigenes
1119	Crohn's disease(CD)	Prevotella copri
1120	Crohn's disease(CD)	Tropheryma whipplei
1121	Crohn's disease(CD)	Collinsella aerofaciens
1122	COPD	Clostridium coccoides
1123	COPD	Staphylococcus aureus
1124	Cystic fibrosis	Bacteroides
1125	Periodontal	Veillonella
1126	Crohn's disease(CD)	Desulfovibrio
1127	Diarrhea Irritable bowel syndrome(IBS)	Clostridium coccoides
1128	Crohn's disease(CD)	Acinetobacter
1129	Crohn's disease(CD)	Corynebacterium
1130	Colorectal carcinoma	Actinobacteria
1131	Necrotizing Enterocolitis	Collinsella aerofaciens
1132	Diarrhea Irritable bowel syndrome(IBS)	Staphylococcus aureus
1133	Periodontal	Escherichia coli
1134	Necrotizing Enterocolitis	Oxalobacter formigenes
1135	Necrotizing Enterocolitis	Prevotella copri
1136	Necrotizing Enterocolitis	Tropheryma whipplei
1137	Cystic fibrosis	Staphylococcus
1138	Skin and mucosal infections	Actinobacteria
1139	Periodontal	Stenotrophomonas maltophilia
1140	Cystic fibrosis	Enterobacteriaceae
1141	Obesity	Lachnospiraceae
1142	Clostridium difficile infection(CDI)	Veillonella
1143	COPD	Actinobacteria
1144	Necrotizing Enterocolitis	Clostridium leptum
1145	Systemic inflammatory response syndrome	Clostridium coccoides
1146	Systemic inflammatory response syndrome	Staphylococcus aureus
1147	Necrotizing Enterocolitis	Desulfovibrio
1148	Necrotizing Enterocolitis	Acinetobacter
1149	Necrotizing Enterocolitis	Corynebacterium
1150	Periodontal	Enterococcus
1151	Necrotizing Enterocolitis	Bacteroides vulgatus
1152	Periodontal	Burkholderia
1153	Diarrhea Irritable bowel syndrome(IBS)	Actinobacteria
1154	Necrotizing Enterocolitis	Bacteroides ovatus
1155	Necrotizing Enterocolitis	Bacteroides uniformis
1156	Ileal Crohn's disease(CD)	Clostridia
1157	Necrotizing Enterocolitis	Faecalibacterium prausnitzii
1158	Periodontal	Klebsiella
1159	Clostridium difficile infection(CDI)	Escherichia coli
1160	Systemic inflammatory response syndrome	Actinobacteria
1161	Crohn's disease(CD)	Dietzia maris
1162	Crohn's disease(CD)	Staphylococcus epidermidis
1163	Asthma	Clostridia
1164	Obesity	Bifidobacterium
1165	Clostridium difficile infection(CDI)	Stenotrophomonas maltophilia
1166	Kidney stones	Clostridium coccoides
1167	New-onset untreated rheumatoid arthrits	Clostridium coccoides
1168	Whipple's disease	Clostridium coccoides
1169	Kidney stones	Staphylococcus aureus
1170	New-onset untreated rheumatoid arthrits	Staphylococcus aureus
1171	Whipple's disease	Staphylococcus aureus
1172	Clostridium difficile infection(CDI)	Klebsiella
1173	Clostridium difficile infection(CDI)	Enterococcus
1174	Obesity	Haemophilus
1175	Crohn's disease(CD)	Pseudomonas
1176	Crohn's disease(CD)	Fusobacterium nucleatum
1177	Clostridium difficile infection(CDI)	Burkholderia
1178	Crohn's disease(CD)	Propionibacterium
1179	Crohn's disease(CD)	Propionibacterium acnes
1180	Rheumatoid arthrits	Staphylococcus aureus
1181	Necrotizing Enterocolitis	Dietzia maris
1182	Necrotizing Enterocolitis	Staphylococcus epidermidis
1183	Obesity	Lactobacillus
1184	Colon cancer	Clostridium coccoides
1185	Cystic fibrosis	Veillonella
1186	Cystic fibrosis	Escherichia coli
1187	Clostridium difficile infection(CDI)	Fusobacterium
1188	Clostridium difficile infection(CDI)	Streptococcus
1189	Colon cancer	Staphylococcus aureus
1190	Eczema	Staphylococcus aureus
1191	Eczema	Clostridium coccoides
1192	Periodontal	Oxalobacter formigenes
1193	Periodontal	Prevotella copri
1194	Periodontal	Tropheryma whipplei
1195	Kidney stones	Actinobacteria
1196	New-onset untreated rheumatoid arthrits	Actinobacteria
1197	Whipple's disease	Actinobacteria
1198	Obesity	Bacteroides
1199	Periodontal	Collinsella aerofaciens
1200	Crohn's disease(CD)	Alcaligenaceae
1201	Crohn's disease(CD)	Coriobacteriaceae
1202	Crohn's disease(CD)	Erysipelotrichaceae
1203	Crohn's disease(CD)	Methanobrevibacter smithii
1204	Necrotizing Enterocolitis	Propionibacterium
1205	Necrotizing Enterocolitis	Propionibacterium acnes
1206	Crohn's disease(CD)	Prevotellaceae
1207	Crohn's disease(CD)	Bacteroides fragilis
1208	Crohn's disease(CD)	Bacilli
1209	Crohn's disease(CD)	Clostridium
1210	Necrotizing Enterocolitis	Pseudomonas
1211	Crohn's disease(CD)	Oxalobacteraceae
1212	Crohn's disease(CD)	Comamonadaceae
1213	Crohn's disease(CD)	Sphingomonadaceae
1214	Necrotizing Enterocolitis	Fusobacterium nucleatum
1215	Rheumatoid arthrits	Actinobacteria
1216	Psoriasis	Clostridia
1217	Atopy	Clostridium coccoides
1218	Obesity	Staphylococcus
1219	Periodontal	Clostridium leptum
1220	Cystic fibrosis	Enterococcus
1221	Crohn's disease(CD)	Betaproteobacteria
1222	Atopy	Staphylococcus aureus
1223	Periodontal	Desulfovibrio
1224	Inflammatory bowel disease(IBD)	Clostridium coccoides
1225	Periodontal	Acinetobacter
1226	Periodontal	Corynebacterium
1227	Periodontal	Bacteroides uniformis
1228	Crohn's disease(CD)	Xanthomonas
1229	Crohn's disease(CD)	Lysobacter
1230	Crohn's disease(CD)	Rickettsiales
1231	Crohn's disease(CD)	Streptococcus mitis
1232	Obesity	Enterobacteriaceae
1233	Atopic dermatitis	Clostridia
1234	Colon cancer	Actinobacteria
1235	Constipation Irritable bowel syndrome(IBS)	Clostridium coccoides
1236	Infectious colitis	Clostridium coccoides
1237	Crohn's disease(CD)	Coxiellaceae
1238	Constipation Irritable bowel syndrome(IBS)	Staphylococcus aureus
1239	Infectious colitis	Staphylococcus aureus
1240	Periodontal	Bacteroides ovatus
1241	Periodontal	Bacteroides vulgatus
1242	Crohn's disease(CD)	Tannerella
1243	Eczema	Actinobacteria
1244	Inflammatory bowel disease(IBD)	Staphylococcus aureus
1245	Asthma	Lachnospiraceae
1246	Necrotizing Enterocolitis	Prevotellaceae
1247	Necrotizing Enterocolitis	Alcaligenaceae
1248	Necrotizing Enterocolitis	Coriobacteriaceae
1249	Necrotizing Enterocolitis	Erysipelotrichaceae
1250	Necrotizing Enterocolitis	Methanobrevibacter smithii
1251	Necrotizing Enterocolitis	Comamonadaceae
1252	Necrotizing Enterocolitis	Oxalobacteraceae
1253	Necrotizing Enterocolitis	Sphingomonadaceae
1254	Ulcerative colitis	Staphylococcus aureus
1255	Cystic fibrosis	Klebsiella
1256	Guttate psoriasis	Clostridium coccoides
1257	Periodontal	Faecalibacterium prausnitzii
1258	Crohn's disease(CD)	Treponema
1259	Crohn's disease(CD)	Actinomyces
1260	Crohn's disease(CD)	Porphyromonas gingivalis
1261	Crohn's disease(CD)	Selenomonas
1262	Clostridium difficile infection(CDI)	Collinsella aerofaciens
1263	Crohn's disease(CD)	Verrucomicrobiaceae
1264	Allergic sensitization	Staphylococcus aureus
1265	Atopic sensitisation	Staphylococcus aureus
1266	Recurrent wheeze	Staphylococcus aureus
1267	Clostridium difficile infection(CDI)	Oxalobacter formigenes
1268	Clostridium difficile infection(CDI)	Prevotella copri
1269	Clostridium difficile infection(CDI)	Tropheryma whipplei
1270	Gastric and duodenal ulcer	Clostridium coccoides
1271	Gastro-oesophageal reflux	Clostridium coccoides
1272	Allergic asthma	Clostridium coccoides
1273	Allergy	Clostridium coccoides
1274	Allergic sensitization	Clostridium coccoides
1275	Atopic sensitisation	Clostridium coccoides
1276	Recurrent wheeze	Clostridium coccoides
1277	Allergic asthma	Staphylococcus aureus
1278	Allergy	Staphylococcus aureus
1279	Gastric and duodenal ulcer	Staphylococcus aureus
1280	Gastro-oesophageal reflux	Staphylococcus aureus
1281	Necrotizing Enterocolitis	Bacteroides fragilis
1282	Atopy	Actinobacteria
1283	Necrotizing Enterocolitis	Coxiellaceae
1284	Clostridium difficile infection(CDI)	Bacteroides uniformis
1285	Crohn's disease(CD)	Bacteroidaceae
1286	Crohn's disease(CD)	Parabacteroides
1287	Crohn's disease(CD)	Alistipes
1288	Necrotizing Enterocolitis	Xanthomonas
1289	Necrotizing Enterocolitis	Lysobacter
1290	Necrotizing Enterocolitis	Rickettsiales
1291	Necrotizing Enterocolitis	Streptococcus mitis
1292	Clostridium difficile infection(CDI)	Bacteroides vulgatus
1293	Cystic fibrosis	Fusobacterium
1294	Crohn's disease(CD)	Porphyromonas
1295	Necrotizing Enterocolitis	Betaproteobacteria
1296	Cystic fibrosis	Streptococcus
1297	Constipation Irritable bowel syndrome(IBS)	Actinobacteria
1298	Ileal Crohn's disease(CD)	Bifidobacterium
1299	Necrotizing Enterocolitis	Bacilli
1300	Crohn's disease(CD)	Porphyromonadaceae
1301	Infectious colitis	Actinobacteria
1302	Necrotizing Enterocolitis	Clostridium
1303	Clostridium difficile infection(CDI)	Bacteroides ovatus
1304	Crohn's disease(CD)	Rikenellaceae
1305	Crohn's disease(CD)	Ruminococcaceae
1306	Clostridium difficile infection(CDI)	Clostridium leptum
1307	Clostridium difficile infection(CDI)	Desulfovibrio
1308	Necrotizing Enterocolitis	Treponema
1309	Necrotizing Enterocolitis	Actinomyces
1310	Necrotizing Enterocolitis	Porphyromonas gingivalis
1311	Necrotizing Enterocolitis	Selenomonas
1312	Guttate psoriasis	Actinobacteria
1313	Clostridium difficile infection(CDI)	Acinetobacter
1314	Clostridium difficile infection(CDI)	Corynebacterium
1315	Necrotizing Enterocolitis	Verrucomicrobiaceae
1316	Necrotizing Enterocolitis	Tannerella
1317	Periodontal	Dietzia maris
1318	Periodontal	Staphylococcus epidermidis
1319	Allergic asthma	Actinobacteria
1320	Allergy	Actinobacteria
1321	Gastric and duodenal ulcer	Actinobacteria
1322	Gastro-oesophageal reflux	Actinobacteria
1323	Allergic sensitization	Actinobacteria
1324	Atopic sensitisation	Actinobacteria
1325	Recurrent wheeze	Actinobacteria
1326	Asthma	Bifidobacterium
1327	Clostridium difficile infection(CDI)	Faecalibacterium prausnitzii
1328	Cystic fibrosis	Collinsella aerofaciens
1329	Crohn's disease(CD)	Klebsiella pneumoniae
1330	Crohn's disease(CD)	Enterobacter aerogenes
1331	Crohn's disease(CD)	Enterobacter hormaechei
1332	Crohn's disease(CD)	Shigella dysenteriae
1333	Crohn's disease(CD)	Gammaproteobacteria
1334	Necrotizing Enterocolitis	Bacteroidaceae
1335	Cystic fibrosis	Oxalobacter formigenes
1336	Cystic fibrosis	Prevotella copri
1337	Cystic fibrosis	Tropheryma whipplei
1338	Ileal Crohn's disease(CD)	Haemophilus
1339	Necrotizing Enterocolitis	Porphyromonas
1340	Necrotizing Enterocolitis	Porphyromonadaceae
1341	Necrotizing Enterocolitis	Rikenellaceae
1342	Necrotizing Enterocolitis	Ruminococcaceae
1343	Necrotizing Enterocolitis	Parabacteroides
1344	Necrotizing Enterocolitis	Alistipes
1345	Psoriasis	Lachnospiraceae
1346	Ileal Crohn's disease(CD)	Lactobacillus
1347	Type 2 diabetes	Lachnospiraceae
1348	Skin and mucosal infections	Clostridia
1349	Crohn's disease(CD)	Citrobacter
1350	Obesity	Veillonella
1351	Asthma	Lactobacillus
1352	Periodontal	Pseudomonas
1353	Periodontal	Fusobacterium nucleatum
1354	Cystic fibrosis	Clostridium leptum
1355	Obesity	Stenotrophomonas maltophilia
1356	Ileal Crohn's disease(CD)	Bacteroides
1357	Obesity	Escherichia coli
1358	Atopic dermatitis	Lachnospiraceae
1359	Cystic fibrosis	Desulfovibrio
1360	COPD	Clostridia
1361	Periodontal	Propionibacterium
1362	Periodontal	Propionibacterium acnes
1363	Cystic fibrosis	Acinetobacter
1364	Cystic fibrosis	Corynebacterium
1365	Necrotizing Enterocolitis	Bacteroidales
1366	Necrotizing Enterocolitis	Enterococcus faecium
1367	Necrotizing Enterocolitis	Erysipelotrichales
1368	Necrotizing Enterocolitis	Clostridiales
1369	Necrotizing Enterocolitis	Fusobacteriaceae
1370	Necrotizing Enterocolitis	Veillonellaceae
1371	Cystic fibrosis	Bacteroides vulgatus
1372	Cystic fibrosis	Bacteroides ovatus
1373	Cystic fibrosis	Bacteroides uniformis
1374	Asthma	Bacteroides
1375	Diarrhea Irritable bowel syndrome(IBS)	Clostridia
1376	Clostridium difficile infection(CDI)	Dietzia maris
1377	Clostridium difficile infection(CDI)	Staphylococcus epidermidis
1378	Cystic fibrosis	Faecalibacterium prausnitzii
1379	Periodontal	Coriobacteriaceae
1380	Periodontal	Erysipelotrichaceae
1381	Periodontal	Alcaligenaceae
1382	Periodontal	Methanobrevibacter smithii
1383	Ileal Crohn's disease(CD)	Enterobacteriaceae
1384	Periodontal	Comamonadaceae
1385	Periodontal	Oxalobacteraceae
1386	Periodontal	Sphingomonadaceae
1387	Periodontal	Prevotellaceae
1388	Obesity	Enterococcus
1389	Obesity	Burkholderia
1390	Ileal Crohn's disease(CD)	Staphylococcus
1391	Periodontal	Bacteroides fragilis
1392	Psoriasis	Bifidobacterium
1393	Type 2 diabetes	Bifidobacterium
1394	Atopic dermatitis	Bifidobacterium
1395	Periodontal	Bacilli
1396	Systemic inflammatory response syndrome	Clostridia
1397	Periodontal	Xanthomonas
1398	Periodontal	Lysobacter
1399	Periodontal	Rickettsiales
1400	Periodontal	Streptococcus mitis
1401	Obesity	Klebsiella
1402	Clostridium difficile infection(CDI)	Pseudomonas
1403	Periodontal	Clostridium
1404	Asthma	Enterobacteriaceae
1405	Periodontal	Coxiellaceae
1406	Clostridium difficile infection(CDI)	Fusobacterium nucleatum
1407	Cystic fibrosis	Dietzia maris
1408	Cystic fibrosis	Staphylococcus epidermidis
1409	Periodontal	Betaproteobacteria
1410	Clostridium difficile infection(CDI)	Propionibacterium
1411	Clostridium difficile infection(CDI)	Propionibacterium acnes
1412	Psoriasis	Haemophilus
1413	Type 2 diabetes	Haemophilus
1414	Colorectal carcinoma	Lachnospiraceae
1415	Psoriasis	Lactobacillus
1416	Periodontal	Verrucomicrobiaceae
1417	Obesity	Fusobacterium
1418	Obesity	Streptococcus
1419	Clostridium difficile infection(CDI)	Bacteroides fragilis
1420	Clostridium difficile infection(CDI)	Prevotellaceae
1421	Atopic dermatitis	Lactobacillus
1422	Clostridium difficile infection(CDI)	Coriobacteriaceae
1423	Clostridium difficile infection(CDI)	Erysipelotrichaceae
1424	Clostridium difficile infection(CDI)	Methanobrevibacter smithii
1425	Clostridium difficile infection(CDI)	Alcaligenaceae
1426	Periodontal	Parabacteroides
1427	Periodontal	Alistipes
1428	Skin and mucosal infections	Lachnospiraceae
1429	Periodontal	Bacteroidaceae
1430	Atopic dermatitis	Haemophilus
1431	Clostridium difficile infection(CDI)	Comamonadaceae
1432	Clostridium difficile infection(CDI)	Oxalobacteraceae
1433	Clostridium difficile infection(CDI)	Sphingomonadaceae
1434	Periodontal	Rikenellaceae
1435	Periodontal	Ruminococcaceae
1436	Periodontal	Porphyromonadaceae
1437	Type 2 diabetes	Bacteroides
1438	Cystic fibrosis	Pseudomonas
1439	COPD	Lachnospiraceae
1440	Crohn's disease(CD)	Megasphaera
1441	Crohn's disease(CD)	Alistipes finegoldii
1442	Crohn's disease(CD)	Alistipes putredinis
1443	Crohn's disease(CD)	Bacteroides eggerthii
1444	Crohn's disease(CD)	Bacteroides finegoldii
1445	Crohn's disease(CD)	Bacteroides sp. D20
1446	Crohn's disease(CD)	Bilophila
1447	Crohn's disease(CD)	Bilophila wadsworthia
1448	Crohn's disease(CD)	Enterococcus faecalis
1449	Crohn's disease(CD)	Eubacterium hallii
1450	Crohn's disease(CD)	Holdemania
1451	Crohn's disease(CD)	Lachnospira
1452	Crohn's disease(CD)	Lactobacillus salivarius
1453	Crohn's disease(CD)	Odoribacter splanchnicus
1454	Crohn's disease(CD)	Parabacteroides distasonis
1455	Crohn's disease(CD)	Parabacteroides merdae
1456	Crohn's disease(CD)	Roseburia hominis
1457	Crohn's disease(CD)	Roseburia intestinalis
1458	Crohn's disease(CD)	Ruminococcus gnavus
1459	Crohn's disease(CD)	Streptococcus anginosus
1460	Crohn's disease(CD)	Streptococcus parasanguinis
1461	Crohn's disease(CD)	Streptococcus salivarius
1462	Crohn's disease(CD)	Streptococcus vestibularis
1463	Crohn's disease(CD)	Veillonella atypica
1464	Crohn's disease(CD)	Veillonella dispar
1465	Crohn's disease(CD)	Veillonella parvula
1466	Kidney stones	Clostridia
1467	New-onset untreated rheumatoid arthrits	Clostridia
1468	Whipple's disease	Clostridia
1469	Psoriasis	Bacteroides
1470	Crohn's disease(CD)	Haemophilus parainfluenzae
1471	Crohn's disease(CD)	Ruminococcus
1472	Crohn's disease(CD)	Streptococcaceae
1473	Crohn's disease(CD)	Coprococcus
1474	Crohn's disease(CD)	Dorea
1475	Crohn's disease(CD)	Pasteurellaceae
1476	Crohn's disease(CD)	Streptobacillus
1477	Crohn's disease(CD)	Aerococcus
1478	Crohn's disease(CD)	Atopobium
1479	Crohn's disease(CD)	Atopobium vaginae
1480	Crohn's disease(CD)	Candidate division TM7
1481	Crohn's disease(CD)	Eggerthella
1482	Crohn's disease(CD)	Gardnerella
1483	Crohn's disease(CD)	Gardnerella vaginalis
1484	Crohn's disease(CD)	Lactobacillus crispatus
1485	Crohn's disease(CD)	Lactobacillus iners
1486	Crohn's disease(CD)	Leptotrichia
1487	Crohn's disease(CD)	Leptotrichia amnionii
1488	Crohn's disease(CD)	Mobiluncus
1489	Crohn's disease(CD)	Olsenella
1490	Crohn's disease(CD)	Papillibacter
1491	Crohn's disease(CD)	Porphyromonas uenonis
1492	Clostridium difficile infection(CDI)	Bacilli
1493	Cystic fibrosis	Fusobacterium nucleatum
1494	Atopic dermatitis	Bacteroides
1495	Clostridium difficile infection(CDI)	Clostridium
1496	Crohn's disease(CD)	Acidobacteriaceae
1497	Crohn's disease(CD)	Aeromonadaceae
1498	Crohn's disease(CD)	Alteromonadaceae
1499	Crohn's disease(CD)	Anaerovorax
1500	Crohn's disease(CD)	Bacillaceae
1501	Crohn's disease(CD)	Bifidobacterium catenulatum
1502	Crohn's disease(CD)	Cellulomonadaceae
1503	Crohn's disease(CD)	Clostridiaceae
1504	Crohn's disease(CD)	Clostridium cocleatum
1505	Crohn's disease(CD)	Desulfobacteraceae
1506	Crohn's disease(CD)	Desulfovibrionaceae
1507	Crohn's disease(CD)	Nitrospiraceae
1508	Crohn's disease(CD)	Paenibacillaceae
1509	Crohn's disease(CD)	Peptostreptococcaceae
1510	Crohn's disease(CD)	Polyangiaceae
1511	Crohn's disease(CD)	Promicromonosporaceae
1512	Crohn's disease(CD)	Ruminococcus productus
1513	Crohn's disease(CD)	Syntrophobacteraceae
1514	Crohn's disease(CD)	Thiotrichaceae
1515	Cystic fibrosis	Propionibacterium
1516	Cystic fibrosis	Propionibacterium acnes
1517	Clostridium difficile infection(CDI)	Coxiellaceae
1518	Clostridium difficile infection(CDI)	Xanthomonas
1519	Clostridium difficile infection(CDI)	Lysobacter
1520	Clostridium difficile infection(CDI)	Rickettsiales
1521	Clostridium difficile infection(CDI)	Streptococcus mitis
1522	Clostridium difficile infection(CDI)	Betaproteobacteria
1523	Obesity	Collinsella aerofaciens
1524	Obesity	Prevotella copri
1525	Obesity	Oxalobacter formigenes
1526	Obesity	Tropheryma whipplei
1527	Rheumatoid arthrits	Clostridia
1528	Crohn's disease(CD)	Eubacterium
1529	Crohn's disease(CD)	Fusobacteria
1530	Periodontal	Fusobacteriaceae
1531	Periodontal	Veillonellaceae
1532	Crohn's disease(CD)	Eubacterium eligens
1533	Crohn's disease(CD)	Eubacterium rectale
1534	Crohn's disease(CD)	Faecalibacterium
1535	Crohn's disease(CD)	Odoribacter
1536	Crohn's disease(CD)	Phascolarctobacterium
1537	Crohn's disease(CD)	Roseburia
1538	Crohn's disease(CD)	Subdoligranulum
1539	Diarrhea Irritable bowel syndrome(IBS)	Lachnospiraceae
1540	Periodontal	Bacteroidales
1541	Periodontal	Enterococcus faecium
1542	Periodontal	Erysipelotrichales
1543	Ileal Crohn's disease(CD)	Veillonella
1544	Clostridium difficile infection(CDI)	Tannerella
1545	Periodontal	Enterobacter aerogenes
1546	Periodontal	Enterobacter hormaechei
1547	Periodontal	Klebsiella pneumoniae
1548	Periodontal	Shigella dysenteriae
1549	Type 2 diabetes	Enterobacteriaceae
1550	Clostridium difficile infection(CDI)	Porphyromonas
1551	Periodontal	Clostridiales
1552	Crohn's disease(CD)	Shuttleworthia
1553	Crohn's disease(CD)	Eubacteriaceae
1554	Clostridium difficile infection(CDI)	Treponema
1555	Clostridium difficile infection(CDI)	Actinomyces
1556	Clostridium difficile infection(CDI)	Porphyromonas gingivalis
1557	Clostridium difficile infection(CDI)	Selenomonas
1558	Periodontal	Gammaproteobacteria
1559	Colorectal carcinoma	Bifidobacterium
1560	Type 2 diabetes	Staphylococcus
1561	Crohn's disease(CD)	Acetonema
1562	Crohn's disease(CD)	Actinobacillus
1563	Crohn's disease(CD)	Aggregatibacter
1564	Crohn's disease(CD)	Akkermansia
1565	Crohn's disease(CD)	Anaerofilum
1566	Crohn's disease(CD)	Anaerostipes
1567	Crohn's disease(CD)	Anaerotruncus
1568	Crohn's disease(CD)	Bacillus
1569	Crohn's disease(CD)	Bacterium 08.96.4
1570	Crohn's disease(CD)	Bacterium ASF500
1571	Crohn's disease(CD)	Bacterium B4C2-5
1572	Crohn's disease(CD)	Bacterium Ba2
1573	Crohn's disease(CD)	Bacterium C15
1574	Crohn's disease(CD)	Bacterium G100VIII
1575	Crohn's disease(CD)	Bacterium ic1214
1576	Crohn's disease(CD)	Bacterium ic1258
1577	Crohn's disease(CD)	Bacterium ic1292
1578	Crohn's disease(CD)	Bacterium ic1296
1579	Crohn's disease(CD)	Bacterium ic1311
1580	Crohn's disease(CD)	Bacterium ic1379
1581	Crohn's disease(CD)	Bacterium ic1391
1582	Crohn's disease(CD)	Bacterium MB7-1
1583	Crohn's disease(CD)	Bacterium mpn-isolate group 19
1584	Crohn's disease(CD)	Bacterium mpn-isolate group 22
1585	Crohn's disease(CD)	Bacterium mpn-isolate group 24
1586	Crohn's disease(CD)	Bacterium mpn-isolate group 27
1587	Crohn's disease(CD)	Bacterium mpn-isolate group 5
1588	Crohn's disease(CD)	Bacterium 'New Zealand B'
1589	Crohn's disease(CD)	Bacterium str. 31285
1590	Crohn's disease(CD)	Bacterium YE62
1591	Crohn's disease(CD)	Bacterium YE64
1592	Crohn's disease(CD)	Bacteroidaceae bacterium Smarlab 3301643
1593	Crohn's disease(CD)	Bacteroides sp. CJ78
1594	Crohn's disease(CD)	Bacteroides thetaiotaomicron
1595	Crohn's disease(CD)	Bovine rumen bacterium JPR13
1596	Crohn's disease(CD)	Brenneria
1597	Crohn's disease(CD)	Burkholderiales bacterium Smarlab 3302047
1598	Crohn's disease(CD)	Butyrate-producing bacterium ART55/1
1599	Crohn's disease(CD)	Butyrate-producing bacterium L1-810
1600	Crohn's disease(CD)	Butyrate-producing bacterium L1-952
1601	Crohn's disease(CD)	Butyrate-producing bacterium L2-50
1602	Crohn's disease(CD)	Butyrate-producing bacterium M104/1
1603	Crohn's disease(CD)	Butyrate-producing bacterium M21/2
1604	Crohn's disease(CD)	Butyrate-producing bacterium M50/1
1605	Crohn's disease(CD)	Butyrate-producing bacterium P607
1606	Crohn's disease(CD)	Butyrate-producing bacterium PH05YB02
1607	Crohn's disease(CD)	Butyrate-producing bacterium Ph07AY02
1608	Crohn's disease(CD)	Butyrate-producing bacterium PH07AY3
1609	Crohn's disease(CD)	Butyrate-producing bacterium PH07AY5
1610	Crohn's disease(CD)	Butyrate-producing bacterium PH07BY04
1611	Crohn's disease(CD)	Butyrate-producing bacterium SL6/1/1
1612	Crohn's disease(CD)	Butyrate-producing bacterium SM4/1
1613	Crohn's disease(CD)	Butyrate-producing bacterium SR1/1
1614	Crohn's disease(CD)	Butyrate-producing bacterium SR1/5
1615	Crohn's disease(CD)	Butyrate-producing bacterium SS2/1
1616	Crohn's disease(CD)	Butyrate-producing bacterium SSC/2
1617	Crohn's disease(CD)	Butyrate-producing bacterium T2-132
1618	Crohn's disease(CD)	Clostridia bacterium TSW07CA7
1619	Crohn's disease(CD)	Clostridiaceae bacterium bSSV31
1620	Crohn's disease(CD)	Clostridiaceae bacterium LEMV63
1621	Crohn's disease(CD)	Clostridiaceae bacterium SH032
1622	Crohn's disease(CD)	Clostridiaceae bacterium SK061
1623	Crohn's disease(CD)	Clostridiales bacterium 80/3
1624	Crohn's disease(CD)	Clostridiales bacterium A2-162
1625	Crohn's disease(CD)	Clostridiales bacterium AHT16
1626	Crohn's disease(CD)	Clostridiales bacterium L2-14
1627	Crohn's disease(CD)	Clostridium innocuum
1628	Crohn's disease(CD)	Clostridium ramosum
1629	Crohn's disease(CD)	Clostridium spiroforme
1630	Crohn's disease(CD)	Collinsella
1631	Crohn's disease(CD)	Coprobacillus
1632	Crohn's disease(CD)	Cronobacter
1633	Crohn's disease(CD)	Dehalobacterium
1634	Crohn's disease(CD)	Desulfotomaculum
1635	Crohn's disease(CD)	Dialister
1636	Crohn's disease(CD)	Dysgonomonas
1637	Crohn's disease(CD)	Edwardsiella
1638	Crohn's disease(CD)	Enterobacter
1639	Crohn's disease(CD)	Erwinia
1640	Crohn's disease(CD)	Erysipelothrix
1641	Crohn's disease(CD)	Escherichia
1642	Crohn's disease(CD)	Eubacterium tortuosum
1643	Crohn's disease(CD)	Firmicutes bacterium EG14
1644	Crohn's disease(CD)	Firmicutes str. C29
1645	Crohn's disease(CD)	Gram-negative bacterium cL10-2b-4
1646	Crohn's disease(CD)	Hafnia
1647	Crohn's disease(CD)	Human intestinal firmicute CB47
1648	Crohn's disease(CD)	Human intestinal firmicute CO13
1649	Crohn's disease(CD)	Human intestinal firmicute CO19
1650	Crohn's disease(CD)	Human intestinal firmicute CO2
1651	Crohn's disease(CD)	Human intestinal firmicute CO35
1652	Crohn's disease(CD)	Human intestinal firmicute CO4
1653	Crohn's disease(CD)	Human intestinal firmicute CS26
1654	Crohn's disease(CD)	Lachnobacterium
1655	Crohn's disease(CD)	Lachnospiraceae bacterium A2
1656	Crohn's disease(CD)	Lactococcus
1657	Crohn's disease(CD)	Mannheimia
1658	Crohn's disease(CD)	Mastodon intestinal bacterium AN-22-6
1659	Crohn's disease(CD)	Mogibacterium
1660	Crohn's disease(CD)	Oligella
1661	Crohn's disease(CD)	Oscillibacter
1662	Crohn's disease(CD)	Oscillospira
1663	Crohn's disease(CD)	Oscillospiraceae bacterium NML 061048
1664	Crohn's disease(CD)	Pantoea
1665	Crohn's disease(CD)	Pasteurella
1666	Crohn's disease(CD)	Pectobacterium
1667	Crohn's disease(CD)	Peptostreptococcus
1668	Crohn's disease(CD)	Pusillimonas
1669	Crohn's disease(CD)	Rumen bacterium 8/94-32
1670	Crohn's disease(CD)	Rumen bacterium R-7
1671	Crohn's disease(CD)	Rumen bacterium R-9
1672	Crohn's disease(CD)	Salmonella
1673	Crohn's disease(CD)	Segmented filamentous bacterium
1674	Crohn's disease(CD)	Serratia
1675	Crohn's disease(CD)	Shigella
1676	Crohn's disease(CD)	Solobacterium
1677	Crohn's disease(CD)	Sutterella
1678	Crohn's disease(CD)	Swine fecal bacterium FPC67
1679	Crohn's disease(CD)	Swine fecal bacterium FPC70
1680	Crohn's disease(CD)	Swine fecal bacterium RF3E-Xyl1
1681	Crohn's disease(CD)	Swine fecal bacterium SD-Pec1
1682	Crohn's disease(CD)	Swine manure pit bacterium PPC108
1683	Crohn's disease(CD)	Tenericutes
1684	Crohn's disease(CD)	Terrahaemophilus
1685	Crohn's disease(CD)	Unidentified bacterium ZF3
1686	Crohn's disease(CD)	Verrucomicrobia
1687	Crohn's disease(CD)	Verrucomicrobia bacterium MS-F-88
1688	Crohn's disease(CD)	Vibrio
1689	Crohn's disease(CD)	Yersinia
1690	Cystic fibrosis	Prevotellaceae
1691	Ileal Crohn's disease(CD)	Escherichia coli
1692	Cystic fibrosis	Alcaligenaceae
1693	Cystic fibrosis	Coriobacteriaceae
1694	Cystic fibrosis	Erysipelotrichaceae
1695	Cystic fibrosis	Methanobrevibacter smithii
1696	Psoriasis	Enterobacteriaceae
1697	Colon cancer	Clostridia
1698	Atopic dermatitis	Staphylococcus
1699	Skin and mucosal infections	Bifidobacterium
1700	Colorectal carcinoma	Haemophilus
1701	Periodontal	Citrobacter
1702	Eczema	Clostridia
1703	Necrotizing Enterocolitis	Acidobacteriaceae
1704	Necrotizing Enterocolitis	Aeromonadaceae
1705	Necrotizing Enterocolitis	Alteromonadaceae
1706	Necrotizing Enterocolitis	Anaerovorax
1707	Necrotizing Enterocolitis	Bacillaceae
1708	Necrotizing Enterocolitis	Bifidobacterium catenulatum
1709	Necrotizing Enterocolitis	Cellulomonadaceae
1710	Necrotizing Enterocolitis	Clostridiaceae
1711	Necrotizing Enterocolitis	Clostridium cocleatum
1712	Necrotizing Enterocolitis	Desulfobacteraceae
1713	Necrotizing Enterocolitis	Desulfovibrionaceae
1714	Necrotizing Enterocolitis	Nitrospiraceae
1715	Necrotizing Enterocolitis	Paenibacillaceae
1716	Necrotizing Enterocolitis	Peptostreptococcaceae
1717	Necrotizing Enterocolitis	Polyangiaceae
1718	Necrotizing Enterocolitis	Promicromonosporaceae
1719	Necrotizing Enterocolitis	Ruminococcus productus
1720	Necrotizing Enterocolitis	Syntrophobacteraceae
1721	Necrotizing Enterocolitis	Thiotrichaceae
1722	Cystic fibrosis	Comamonadaceae
1723	Cystic fibrosis	Oxalobacteraceae
1724	Cystic fibrosis	Sphingomonadaceae
1725	Asthma	Veillonella
1726	Obesity	Clostridium leptum
1727	Atopic dermatitis	Enterobacteriaceae
1728	Necrotizing Enterocolitis	Coprococcus
1729	Necrotizing Enterocolitis	Dorea
1730	Necrotizing Enterocolitis	Haemophilus parainfluenzae
1731	Necrotizing Enterocolitis	Pasteurellaceae
1732	Necrotizing Enterocolitis	Ruminococcus
1733	Necrotizing Enterocolitis	Streptococcaceae
1734	Obesity	Desulfovibrio
1735	Necrotizing Enterocolitis	Streptobacillus
1736	Necrotizing Enterocolitis	Aerococcus
1737	Necrotizing Enterocolitis	Atopobium
1738	Necrotizing Enterocolitis	Atopobium vaginae
1739	Necrotizing Enterocolitis	Gardnerella
1740	Necrotizing Enterocolitis	Gardnerella vaginalis
1741	Necrotizing Enterocolitis	Lactobacillus crispatus
1742	Necrotizing Enterocolitis	Lactobacillus iners
1743	Necrotizing Enterocolitis	Leptotrichia
1744	Necrotizing Enterocolitis	Leptotrichia amnionii
1745	Necrotizing Enterocolitis	Mobiluncus
1746	Necrotizing Enterocolitis	Olsenella
1747	Necrotizing Enterocolitis	Papillibacter
1748	Necrotizing Enterocolitis	Candidate division TM7
1749	Necrotizing Enterocolitis	Eggerthella
1750	Necrotizing Enterocolitis	Porphyromonas uenonis
1751	Obesity	Acinetobacter
1752	Obesity	Corynebacterium
1753	Systemic inflammatory response syndrome	Lachnospiraceae
1754	Necrotizing Enterocolitis	Alistipes finegoldii
1755	Necrotizing Enterocolitis	Alistipes putredinis
1756	Necrotizing Enterocolitis	Bacteroides eggerthii
1757	Necrotizing Enterocolitis	Bacteroides finegoldii
1758	Necrotizing Enterocolitis	Bacteroides sp. D20
1759	Necrotizing Enterocolitis	Bilophila
1760	Necrotizing Enterocolitis	Bilophila wadsworthia
1761	Necrotizing Enterocolitis	Enterococcus faecalis
1762	Necrotizing Enterocolitis	Eubacterium hallii
1763	Necrotizing Enterocolitis	Holdemania
1764	Necrotizing Enterocolitis	Lachnospira
1765	Necrotizing Enterocolitis	Lactobacillus salivarius
1766	Necrotizing Enterocolitis	Odoribacter splanchnicus
1767	Necrotizing Enterocolitis	Parabacteroides distasonis
1768	Necrotizing Enterocolitis	Parabacteroides merdae
1769	Necrotizing Enterocolitis	Roseburia hominis
1770	Necrotizing Enterocolitis	Roseburia intestinalis
1771	Necrotizing Enterocolitis	Ruminococcus gnavus
1772	Necrotizing Enterocolitis	Streptococcus anginosus
1773	Necrotizing Enterocolitis	Streptococcus parasanguinis
1774	Necrotizing Enterocolitis	Streptococcus salivarius
1775	Necrotizing Enterocolitis	Streptococcus vestibularis
1776	Necrotizing Enterocolitis	Veillonella atypica
1777	Necrotizing Enterocolitis	Veillonella dispar
1778	Necrotizing Enterocolitis	Veillonella parvula
1779	Necrotizing Enterocolitis	Megasphaera
1780	COPD	Bifidobacterium
1781	Colorectal carcinoma	Lactobacillus
1782	Obesity	Bacteroides vulgatus
1783	Necrotizing Enterocolitis	Eubacterium
1784	Cystic fibrosis	Bacteroides fragilis
1785	Asthma	Escherichia coli
1786	Ileal Crohn's disease(CD)	Stenotrophomonas maltophilia
1787	Necrotizing Enterocolitis	Eubacteriaceae
1788	Obesity	Bacteroides ovatus
1789	Obesity	Bacteroides uniformis
1790	Cystic fibrosis	Betaproteobacteria
1791	Necrotizing Enterocolitis	Gram-negative bacterium cL10-2b-4
1792	Necrotizing Enterocolitis	Hafnia
1793	Necrotizing Enterocolitis	Human intestinal firmicute CB47
1794	Necrotizing Enterocolitis	Human intestinal firmicute CO13
1795	Necrotizing Enterocolitis	Human intestinal firmicute CO19
1796	Necrotizing Enterocolitis	Human intestinal firmicute CO2
1797	Necrotizing Enterocolitis	Human intestinal firmicute CO35
1798	Necrotizing Enterocolitis	Human intestinal firmicute CO4
1799	Necrotizing Enterocolitis	Human intestinal firmicute CS26
1800	Necrotizing Enterocolitis	Lachnobacterium
1801	Necrotizing Enterocolitis	Lachnospiraceae bacterium A2
1802	Necrotizing Enterocolitis	Lactococcus
1803	Necrotizing Enterocolitis	Mannheimia
1804	Necrotizing Enterocolitis	Mastodon intestinal bacterium AN-22-6
1805	Necrotizing Enterocolitis	Mogibacterium
1806	Necrotizing Enterocolitis	Oligella
1807	Necrotizing Enterocolitis	Oscillibacter
1808	Necrotizing Enterocolitis	Oscillospira
1809	Necrotizing Enterocolitis	Oscillospiraceae bacterium NML 061048
1810	Necrotizing Enterocolitis	Pantoea
1811	Necrotizing Enterocolitis	Pasteurella
1812	Necrotizing Enterocolitis	Pectobacterium
1813	Necrotizing Enterocolitis	Peptostreptococcus
1814	Necrotizing Enterocolitis	Pusillimonas
1815	Necrotizing Enterocolitis	Rumen bacterium 8/94-32
1816	Necrotizing Enterocolitis	Rumen bacterium R-7
1817	Necrotizing Enterocolitis	Rumen bacterium R-9
1818	Necrotizing Enterocolitis	Salmonella
1819	Necrotizing Enterocolitis	Segmented filamentous bacterium
1820	Necrotizing Enterocolitis	Serratia
1821	Necrotizing Enterocolitis	Shigella
1822	Necrotizing Enterocolitis	Solobacterium
1823	Necrotizing Enterocolitis	Sutterella
1824	Necrotizing Enterocolitis	Swine fecal bacterium FPC67
1825	Necrotizing Enterocolitis	Swine fecal bacterium FPC70
1826	Necrotizing Enterocolitis	Swine fecal bacterium RF3E-Xyl1
1827	Necrotizing Enterocolitis	Swine fecal bacterium SD-Pec1
1828	Necrotizing Enterocolitis	Swine manure pit bacterium PPC108
1829	Necrotizing Enterocolitis	Tenericutes
1830	Necrotizing Enterocolitis	Terrahaemophilus
1831	Necrotizing Enterocolitis	Unidentified bacterium ZF3
1832	Necrotizing Enterocolitis	Verrucomicrobia
1833	Necrotizing Enterocolitis	Verrucomicrobia bacterium MS-F-88
1834	Necrotizing Enterocolitis	Vibrio
1835	Necrotizing Enterocolitis	Yersinia
1836	Necrotizing Enterocolitis	Clostridia bacterium TSW07CA7
1837	Necrotizing Enterocolitis	Clostridiaceae bacterium bSSV31
1838	Necrotizing Enterocolitis	Clostridiaceae bacterium LEMV63
1839	Necrotizing Enterocolitis	Clostridiaceae bacterium SH032
1840	Necrotizing Enterocolitis	Clostridiaceae bacterium SK061
1841	Necrotizing Enterocolitis	Clostridiales bacterium 80/3
1842	Necrotizing Enterocolitis	Clostridiales bacterium A2-162
1843	Necrotizing Enterocolitis	Clostridiales bacterium AHT16
1844	Necrotizing Enterocolitis	Clostridiales bacterium L2-14
1845	Necrotizing Enterocolitis	Clostridium innocuum
1846	Necrotizing Enterocolitis	Clostridium ramosum
1847	Necrotizing Enterocolitis	Clostridium spiroforme
1848	Necrotizing Enterocolitis	Collinsella
1849	Necrotizing Enterocolitis	Coprobacillus
1850	Necrotizing Enterocolitis	Cronobacter
1851	Necrotizing Enterocolitis	Dehalobacterium
1852	Necrotizing Enterocolitis	Desulfotomaculum
1853	Necrotizing Enterocolitis	Dialister
1854	Necrotizing Enterocolitis	Dysgonomonas
1855	Necrotizing Enterocolitis	Edwardsiella
1856	Necrotizing Enterocolitis	Enterobacter
1857	Necrotizing Enterocolitis	Erwinia
1858	Necrotizing Enterocolitis	Erysipelothrix
1859	Necrotizing Enterocolitis	Escherichia
1860	Necrotizing Enterocolitis	Eubacterium tortuosum
1861	Necrotizing Enterocolitis	Firmicutes bacterium EG14
1862	Necrotizing Enterocolitis	Firmicutes str. C29
1863	Necrotizing Enterocolitis	Acetonema
1864	Necrotizing Enterocolitis	Actinobacillus
1865	Necrotizing Enterocolitis	Aggregatibacter
1866	Necrotizing Enterocolitis	Akkermansia
1867	Necrotizing Enterocolitis	Anaerofilum
1868	Necrotizing Enterocolitis	Anaerostipes
1869	Necrotizing Enterocolitis	Anaerotruncus
1870	Necrotizing Enterocolitis	Bacillus
1871	Necrotizing Enterocolitis	Bacterium 08.96.4
1872	Necrotizing Enterocolitis	Bacterium ASF500
1873	Necrotizing Enterocolitis	Bacterium B4C2-5
1874	Necrotizing Enterocolitis	Bacterium Ba2
1875	Necrotizing Enterocolitis	Bacterium C15
1876	Necrotizing Enterocolitis	Bacterium G100VIII
1877	Necrotizing Enterocolitis	Bacterium ic1214
1878	Necrotizing Enterocolitis	Bacterium ic1258
1879	Necrotizing Enterocolitis	Bacterium ic1292
1880	Necrotizing Enterocolitis	Bacterium ic1296
1881	Necrotizing Enterocolitis	Bacterium ic1311
1882	Necrotizing Enterocolitis	Bacterium ic1379
1883	Necrotizing Enterocolitis	Bacterium ic1391
1884	Necrotizing Enterocolitis	Bacterium MB7-1
1885	Necrotizing Enterocolitis	Bacterium mpn-isolate group 19
1886	Necrotizing Enterocolitis	Bacterium mpn-isolate group 22
1887	Necrotizing Enterocolitis	Bacterium mpn-isolate group 24
1888	Necrotizing Enterocolitis	Bacterium mpn-isolate group 27
1889	Necrotizing Enterocolitis	Bacterium mpn-isolate group 5
1890	Necrotizing Enterocolitis	Bacterium 'New Zealand B'
1891	Necrotizing Enterocolitis	Bacterium str. 31285
1892	Necrotizing Enterocolitis	Bacterium YE62
1893	Necrotizing Enterocolitis	Bacterium YE64
1894	Necrotizing Enterocolitis	Bacteroidaceae bacterium Smarlab 3301643
1895	Necrotizing Enterocolitis	Bacteroides sp. CJ78
1896	Necrotizing Enterocolitis	Bacteroides thetaiotaomicron
1897	Necrotizing Enterocolitis	Bovine rumen bacterium JPR13
1898	Necrotizing Enterocolitis	Brenneria
1899	Necrotizing Enterocolitis	Burkholderiales bacterium Smarlab 3302047
1900	Necrotizing Enterocolitis	Butyrate-producing bacterium ART55/1
1901	Necrotizing Enterocolitis	Butyrate-producing bacterium L1-810
1902	Necrotizing Enterocolitis	Butyrate-producing bacterium L2-50
1903	Necrotizing Enterocolitis	Butyrate-producing bacterium M104/1
1904	Necrotizing Enterocolitis	Butyrate-producing bacterium M21/2
1905	Necrotizing Enterocolitis	Butyrate-producing bacterium M50/1
1906	Necrotizing Enterocolitis	Butyrate-producing bacterium P607
1907	Necrotizing Enterocolitis	Butyrate-producing bacterium PH05YB02
1908	Necrotizing Enterocolitis	Butyrate-producing bacterium Ph07AY02
1909	Necrotizing Enterocolitis	Butyrate-producing bacterium PH07AY3
1910	Necrotizing Enterocolitis	Butyrate-producing bacterium PH07AY5
1911	Necrotizing Enterocolitis	Butyrate-producing bacterium PH07BY04
1912	Necrotizing Enterocolitis	Butyrate-producing bacterium SL6/1/1
1913	Necrotizing Enterocolitis	Butyrate-producing bacterium SM4/1
1914	Necrotizing Enterocolitis	Butyrate-producing bacterium SR1/1
1915	Necrotizing Enterocolitis	Butyrate-producing bacterium SR1/5
1916	Necrotizing Enterocolitis	Butyrate-producing bacterium SS2/1
1917	Necrotizing Enterocolitis	Butyrate-producing bacterium SSC/2
1918	Necrotizing Enterocolitis	Butyrate-producing bacterium T2-132
1919	Necrotizing Enterocolitis	Butyrate-producing bacterium L1-952
1920	Necrotizing Enterocolitis	Shuttleworthia
1921	Cystic fibrosis	Clostridium
1922	Necrotizing Enterocolitis	Phascolarctobacterium
1923	Necrotizing Enterocolitis	Eubacterium eligens
1924	Necrotizing Enterocolitis	Eubacterium rectale
1925	Necrotizing Enterocolitis	Faecalibacterium
1926	Necrotizing Enterocolitis	Odoribacter
1927	Necrotizing Enterocolitis	Roseburia
1928	Necrotizing Enterocolitis	Subdoligranulum
1929	Necrotizing Enterocolitis	Fusobacteria
1930	Cystic fibrosis	Bacilli
1931	Asthma	Stenotrophomonas maltophilia
1932	Obesity	Faecalibacterium prausnitzii
1933	Skin and mucosal infections	Haemophilus
1934	Infectious colitis	Clostridia
1935	Cystic fibrosis	Treponema
1936	Cystic fibrosis	Porphyromonas gingivalis
1937	Cystic fibrosis	Selenomonas
1938	Cystic fibrosis	Actinomyces
1939	Constipation Irritable bowel syndrome(IBS)	Clostridia
1940	Clostridium difficile infection(CDI)	Fusobacteriaceae
1941	Clostridium difficile infection(CDI)	Veillonellaceae
1942	Skin and mucosal infections	Lactobacillus
1943	Clostridium difficile infection(CDI)	Citrobacter
1944	Inflammatory bowel disease(IBD)	Clostridia
1945	Clostridium difficile infection(CDI)	Gammaproteobacteria
1946	Clostridium difficile infection(CDI)	Enterobacter aerogenes
1947	Clostridium difficile infection(CDI)	Enterobacter hormaechei
1948	Clostridium difficile infection(CDI)	Klebsiella pneumoniae
1949	Clostridium difficile infection(CDI)	Shigella dysenteriae
1950	Clostridium difficile infection(CDI)	Bacteroidales
1951	Clostridium difficile infection(CDI)	Enterococcus faecium
1952	Clostridium difficile infection(CDI)	Erysipelotrichales
1953	Cystic fibrosis	Tannerella
1954	Ulcerative colitis	Clostridia
1955	Cystic fibrosis	Verrucomicrobiaceae
1956	Clostridium difficile infection(CDI)	Clostridiales
1957	Ileal Crohn's disease(CD)	Klebsiella
1958	Ileal Crohn's disease(CD)	Enterococcus
1959	Guttate psoriasis	Clostridia
1960	Asthma	Enterococcus
1961	Ileal Crohn's disease(CD)	Burkholderia
1962	Asthma	Burkholderia
1963	Kidney stones	Lachnospiraceae
1964	New-onset untreated rheumatoid arthrits	Lachnospiraceae
1965	Whipple's disease	Lachnospiraceae
1966	Skin and mucosal infections	Bacteroides
1967	Cystic fibrosis	Porphyromonas
1968	Allergic asthma	Clostridia
1969	Allergy	Clostridia
1970	Gastric and duodenal ulcer	Clostridia
1971	Gastro-oesophageal reflux	Clostridia
1972	Allergic sensitization	Clostridia
1973	Atopic sensitisation	Clostridia
1974	Recurrent wheeze	Clostridia
1975	Systemic inflammatory response syndrome	Bifidobacterium
1976	Cystic fibrosis	Porphyromonadaceae
1977	Cystic fibrosis	Bacteroidaceae
1978	Asthma	Klebsiella
1979	Cystic fibrosis	Rikenellaceae
1980	Cystic fibrosis	Ruminococcaceae
1981	Ileal Crohn's disease(CD)	Fusobacterium
1982	Cystic fibrosis	Alistipes
1983	Cystic fibrosis	Parabacteroides
1984	COPD	Bacteroides
1985	Ileal Crohn's disease(CD)	Streptococcus
1986	Diarrhea Irritable bowel syndrome(IBS)	Haemophilus
1987	Diarrhea Irritable bowel syndrome(IBS)	Lactobacillus
1988	Obesity	Dietzia maris
1989	Obesity	Staphylococcus epidermidis
1990	Rheumatoid arthrits	Lachnospiraceae
1991	Psoriasis	Veillonella
1992	Colorectal carcinoma	Staphylococcus
1993	Type 2 diabetes	Veillonella
1994	Asthma	Fusobacterium
1995	Colorectal carcinoma	Enterobacteriaceae
1996	Asthma	Streptococcus
1997	Skin and mucosal infections	Staphylococcus
1998	Cystic fibrosis	Gammaproteobacteria
1999	Cystic fibrosis	Bacteroidales
2000	Cystic fibrosis	Enterococcus faecium
[truncated: 8,938 more rows]
